# Supplementary material for: The Use of Prescription Drugs, Recreational Drugs, and “Soft Enhancers” for Cognitive Enhancement among Swiss Secondary School Students
Source: PLoS One. 2015 Oct 27;10(10):e0141289. doi: 10.1371/journal.pone.0141289 (PMC4624689; doi:10.1371/journal.pone.0141289)
Supplement: S1 File — (PDF) [file pone.0141289.s001.pdf]

# **Stress und Hirndoping an Berufsvorbereitungs-, Berufsfach- und Mittelschulen im Kanton Zürich**

Eine Studie des Schweizer Instituts für Sucht- und Gesundheitsforschung

## **Liebe Schülerin, lieber Schüler**

In den Medien ist in letzter Zeit immer wieder von „Hirndoping“ die Rede. Unter Hirndoping versteht man die Einnahme von Medikamenten und/oder anderen Substanzen mit dem Ziel die geistige Leistungsfähigkeit zu verbessern (zum Beispiel um länger lernen zu können, sich besser in der Schule zu konzentrieren oder die Nervosität vor oder während einer Prüfung zu reduzieren). Laut Ergebnissen aus der Forschung greifen manche Schüler und Studierende, besonders während anspruchsvollen und stressigen Zeiten, wie vor Prüfungen, zu diesen „Hilfsmitteln“.

Wir führen deshalb eine anonyme Befragung zur aktuellen Situation von Schülerinnen und Schülern an Berufsfach-, Berufsvorbereitungs- und Mittelschulen des Kantons Zürich, zum Umgang mit Stress in der Schule und im speziellen zu Hirndoping durch.

Die Beantwortung dieses Fragebogens dauert ca. 15 Minuten.

Du hast jederzeit die Möglichkeit deine Teilnahme vorzeitig ohne Angaben von Gründen abubrechen. Wir bitten Dich aber den Fragebogen möglichst vollständig und möglichst wahrheitsgetreu zu beantworten.

Die Befragung erfolgt anonym, das heisst es kann kein Rückschluss auf deine Person und kein Zusammenhang zu deinen Antworten hergestellt werden. Nach Abschluss des Fragebogens werden die Daten mit einem Sicherheitsschlüssel an einen Sicherheitsserver der Universität Zürich übermittelt.

Mit der Teilnahme an dieser Befragung leistest Du einen wichtigen Beitrag für die Gesundheitsforschung in der Schweiz.

Bitte lies die Fragen genau durch und beantworte sie ehrlich.

Herzlichen Dank für Deine Teilnahme.

Projektleitung:

PD Dr. Michael Schaub, Direktor Schweizer Institut für Sucht- und Gesundheitsforschung; lic. phil  
Domenic Schnoz, Leiter Zürcher Fachstelle für Alkohol- und Medikamentenprobleme; Vigeli Venzin,  
Leiter Fachstelle Suchtprävention Mittelschulen und Berufsbildung

# Einverständniserklärung

1

## Einverständniserklärung zur Befragung: „Stress und Hirndoping an Berufsvorbereitungs-, Berufsfach- und Mittelschulen des Kantons Zürich“

Ich bestätige, dass ich freiwillig an der oben genannten Befragung teilnehme. Ich werde in dieser Befragung am Computer Angaben zu meiner Person (anonymisiert), meinem Umgang mit Stress und zu Hirndoping machen. Die Befragung dauert etwa 15 Minuten.

Ich bin einverstanden, dass meine Befragungsangaben in vollständig anonymisierten Form, so dass keine Rückschlüsse auf meine Person gemacht werden können, an das Schweizer Institut für Sucht- und Gesundheitsforschung der Universität Zürich weiter geleitet, dort ausgewertet und über die Gesamtergebnisse berichtet werden darf.

Ich habe Kenntnis davon genommen, dass ich jederzeit die Möglichkeit habe die Befragung ohne Angaben von Gründen zu beenden und dass sich keine Nachteile durch eine Nicht-Teilnahme an der Studie ergeben.

Bitte wählen Sie alle zutreffenden Antworten aus:

- ☐ Ich habe den Text der Einverständniserklärung gelesen, verstanden und bin damit einverstanden

Solltest Du im Nachhinein Fragen haben, darfst Du dich gerne an uns wenden ([hirndopingfragen@hotmail.com](mailto:hirndopingfragen@hotmail.com)).

## Schule und Beruf

Ein paar Fragen zu deiner schulischen und/oder beruflichen Situation.

### 2 Welche Schule besuchst Du?

Bitte wählen Sie nur eine der folgenden Antworten aus:

- ☐ Berufsfachschule/Lehre
- ☐ Mittelschule/Gymnasium
- ☐ Berufsvorbereitungsschule/10. Schuljahr

### 3 Welches Berufsschuljahr/Lehrjahr besuchst Du?

**Beantworten Sie diese Frage nur, wenn folgende Bedingungen erfüllt sind:**

Antwort war 'Berufsfachschule/Lehre' bei Frage 2 (Welche Schule besuchst Du?)

Bitte wählen Sie nur eine der folgenden Antworten aus:

- ☐ Erstes Jahr
- ☐ Zweites Jahr
- ☐ Drittes Jahr
- ☐ Viertes Jahr

### 4 Welche Berufsfachschule besuchst Du?

**Beantworten Sie diese Frage nur, wenn folgende Bedingungen erfüllt sind:**

Antwort war 'Berufsfachschule/Lehre' bei Frage 2 (Welche Schule besuchst Du?)

Bitte wählen Sie nur eine der folgenden Antworten aus:

- ☐ Allgemeine Berufsschule Zürich (ABZ)
- ☐ Baugewerbliche Berufsschule Zürich (BBZ)

- ☐ Berufsbildungsschule Winterthur (BBW)
- ☐ Berufsbildungszentrum Dietikon (BZD)
- ☐ Berufsfachschule Winterthur (BFS)
- ☐ Berufsschule Bülach (BSB)
- ☐ Berufsschule für Detailhandel Zürich (DHZ)
- ☐ Berufsschule für Gestaltung Zürich (BGZ)
- ☐ Berufsschule für Hörgeschädigte Zürich (BSFH)
- ☐ Berufsschule Mode und Gestaltung Zürich (MGZ)
- ☐ Berufsschule Rüti (BSR)
- ☐ Gewerblich-Industrielle Berufsschule Uster (GIBU)
- ☐ Bildungszentrum Zürichsee (BZZ)
- ☐ Careum Bildungszentrum (CBZ)
- ☐ Gewerbliche Berufsschule Wetzikon (GBW)
- ☐ KV Zürich Business School (KVZBS)
- ☐ Landwirtschaftliches Bildungszentrum Strickhof
- ☐ Modeco
- ☐ MSW-Winterthur
- ☐ Technische Berufsschule Zürich (TBZ)
- ☐ Wirtschaftsschule KV Uster (WSKVU)
- ☐ Wirtschaftsschule KV Wetzikon (WKVW)
- ☐ Wirtschaftsschule Winterthur (WSKVW)
- ☐ Zentrum für Ausbildung im Gesundheitswesen (ZAG)
- ☐ Sonstiges

##### 5 Welche Lehre machst Du?

**Beantworten Sie diese Frage nur, wenn folgende Bedingungen erfüllt sind:**

Antwort war 'Berufsfachschule/Lehre' bei Frage 2 (Welche Schule besuchst Du?)

Bitte wählen Sie nur eine der folgenden Antworten aus:

- ☐ Agrarpraktiker/in EBA
- ☐ Anlagen- und Apparatebauer/in EFZ
- ☐ Anlagenführer/in EFZ
- ☐ Architekturmodellbauer/in (EFZ)
- ☐ Assistent/in Gesundheit und Soziales EBA
- ☐ Augenoptiker/in EFZ
- ☐ Automatiker/in EFZ
- ☐ Automatikmonteur/in EFZ
- ☐ Automobil-Assistent/in EBA
- ☐ Automobil-Fachmann/-frau EFZ
- ☐ Automobil-Mechatroniker/in EFZ
- ☐ Bäcker/in-Konditor/in-Confiseur/in EBA

- ☐ Bäcker/in-Konditor/in-Confiseur/in EFZ
- ☐ Baumaschinenmechaniker/in EFZ
- ☐ Baupraktiker/in EBA
- ☐ Bauwerktrenner/in EFZ
- ☐ Bekleidungsgestalter/in EFZ
- ☐ Betonwerker/in EFZ
- ☐ Boden-Parkettleger/in EFZ
- ☐ Bootbauer/in (EFZ)
- ☐ Buchhändler/in EFZ
- ☐ Bühnentänzer/in EFZ
- ☐ Büroassistent/in EBA
- ☐ Carrossier/in Lackiererei EFZ
- ☐ Carrossier/in Spenglerei EFZ
- ☐ Coiffeur/-euse EBA
- ☐ Coiffeur/-euse EFZ
- ☐ Dentalassistent/in EFZ
- ☐ Detailhandelsassistent/in EBA
- ☐ Detailhandelsfachmann/-frau EFZ, Schwerpunkt Beratung
- ☐ Detailhandelsfachmann/-frau EFZ, Schwerpunkt Bewirtschaftung
- ☐ Diätkoch/-köchin EFZ
- ☐ Drogist/in EFZ
- ☐ Drucktechnologe/-login EFZ
- ☐ Elektroinstallateur/in EFZ
- ☐ Elektroniker/in EFZ
- ☐ Elektroplaner/in EFZ
- ☐ Entwässerungstechnologe/-login EFZ
- ☐ Fachmann/-frau Betreuung EFZ
- ☐ Fachmann/-frau Betriebsunterhalt EFZ
- ☐ Fachmann/-frau Bewegungs- und Gesundheitsförderung EFZ
- ☐ Fachmann/-frau Gesundheit EFZ
- ☐ Fachmann/-frau Hauswirtschaft EFZ
- ☐ Fachmann/-frau Information und Dokumentation EFZ
- ☐ Fachmann/-frau Kundendialog EFZ
- ☐ Fahrradmechaniker/in EFZ
- ☐ Fahrzeugschlosser/in EFZ
- ☐ Fleischfachassistent/in EBA
- ☐ Fleischfachmann/-frau EFZ
- ☐ Flexodrucker/in EFZ
- ☐ Florist/in EFZ

- ☐ Gärtner/in EBA
- ☐ Gärtner/in EFZ
- ☐ Gebäudereiniger/in EBA
- ☐ Gebäudereiniger/in EFZ
- ☐ Gebäudetechnikplaner/in Heizung EFZ
- ☐ Gebäudetechnikplaner/in Lüftung EFZ
- ☐ Gebäudetechnikplaner/in Sanitär EFZ
- ☐ Gemüsegärtner/in EFZ
- ☐ Gestalter/in Werbetechnik EFZ
- ☐ Gipser/in (EFZ)
- ☐ Glaser/in EFZ
- ☐ Gleisbauer/in EFZ
- ☐ Gleisbaupraktiker/in EBA
- ☐ Grafiker/in EFZ
- ☐ Grundbauer/in EFZ
- ☐ Gussformer/in EFZ
- ☐ Gusstechnologe/-login EFZ
- ☐ Haustechnikpraktiker/in EBA
- ☐ Hauswirtschaftspraktiker/in EBA
- ☐ Heizungsinstallateur/in EFZ
- ☐ Holzbearbeiter/in EBA
- ☐ Holzhandwerker/in EFZ
- ☐ Hotelfachmann/-frau EFZ
- ☐ Hotellerieangestellte/r EBA
- ☐ Industrie- und Unterlagsbodenbauer/in EFZ
- ☐ Industrie- und Unterlagsbodenbaupraktiker/in EBA
- ☐ Industrielackierer/in EFZ
- ☐ Informatiker/in EFZ
- ☐ Informatikpraktiker/in EBA
- ☐ Innendekorateur/in (EFZ)
- ☐ Isolierspengler/in EFZ
- ☐ Kältesystem-Monteur/in EFZ
- ☐ Kaminfeger/in EFZ
- ☐ Kaufmann/-frau EFZ, Basis-Grundbildung
- ☐ Kaufmann/-frau EFZ, erw. Grundbildung
- ☐ Keramiker/in EFZ
- ☐ Kleinmotorrad- und Fahrradmechaniker/in EFZ
- ☐ Koch/Köchin EFZ
- ☐ Konstrukteur/in EFZ

- ☐ Kosmetiker/in EFZ
- ☐ Küchenangestellte/r EBA
- ☐ Kunststofftechnologe/-login EFZ
- ☐ Laborant/in EFZ
- ☐ Landmaschinenmechaniker/in EFZ
- ☐ Landwirt/in EFZ
- ☐ Lebensmittelpraktiker/in EBA
- ☐ Lebensmitteltechnologe/-login EFZ
- ☐ Logistiker/in EBA
- ☐ Logistiker/in EFZ
- ☐ Maler/in (EFZ)
- ☐ Maurer/in EFZ
- ☐ Mechanikpraktiker/in EBA
- ☐ Mediamatiker/in EFZ
- ☐ Medizinische/r Praxisassistent/in EFZ
- ☐ Metallbauer/in EFZ
- ☐ Metallbaukonstrukteur/in EFZ
- ☐ Metallbaupraktiker/in EBA
- ☐ Metalldrücker/in (EFZ)
- ☐ Milchpraktiker/in EBA
- ☐ Milchtechnologe/-login EFZ
- ☐ Montage-Elektriker/in EFZ
- ☐ Motorgerätemechaniker/in EFZ
- ☐ Motorradmechaniker/in EFZ
- ☐ Müller/in EFZ
- ☐ Multimediaelektroniker/in EFZ
- ☐ Netzelektriker/in EFZ
- ☐ Oberflächenbeschichter/in EFZ
- ☐ Obstfachmann/-frau EFZ
- ☐ Ofenbauer/in EFZ
- ☐ Orthopädieschuhmacher/in EFZ
- ☐ Pferdefachmann/-frau EFZ
- ☐ Pferdewart/in EBA
- ☐ Pflasterer/in EFZ
- ☐ Pharma-Assistent/in EFZ
- ☐ Plattenleger/in EFZ
- ☐ Plattenlegerpraktiker/in EBA
- ☐ Podologe/-in EFZ
- ☐ Polybauer/in EFZ

- ☐ Polybaupraktiker/in EBA
- ☐ Polygraf/in EFZ
- ☐ Polymechaniker/in EFZ
- ☐ Printmedienverarbeiter/in EFZ
- ☐ Produktionsmechaniker/in EFZ
- ☐ Recyclist/in EFZ
- ☐ Reifenpraktiker/in EBA
- ☐ Restaurationsangestellte/r EBA
- ☐ Restaurationsfachmann/-frau EFZ
- ☐ Säger/in Holzindustrie EFZ
- ☐ Sanitärinstallateur/in EFZ
- ☐ Schreiner/in EFZ
- ☐ Schreinerpraktiker/in EBA
- ☐ Schuhmacher/in EFZ
- ☐ Spengler/in EFZ
- ☐ Steinbildhauer/in EFZ
- ☐ Steinmetz/in EFZ
- ☐ Strassenbauer/in EFZ
- ☐ Strassenbaupraktiker/in EBA
- ☐ Strassentransportfachmann/-frau EFZ
- ☐ Systemgastronomiefachmann/-frau EFZ
- ☐ Telematiker/in EFZ
- ☐ Textilpfleger/in EFZ
- ☐ Tiermedizinische/r Praxisassistent/in EFZ
- ☐ Tierpfleger/in EFZ
- ☐ Winzer/in EFZ
- ☐ Zahntechniker/in EFZ
- ☐ Zeichner/in EFZ
- ☐ Zimmermann/Zimmerin EFZ
- ☐ Sonstiges

#### 6 Welche Klasse besucht du?

**Beantworten Sie diese Frage nur, wenn folgende Bedingungen erfüllt sind:**

Antwort war 'Mittelschule/Gymnasium' bei Frage 2 (Welche Schule besuchst Du?)

Bitte wählen Sie nur eine der folgenden Antworten aus:

- ☐ 1. Klasse Langzeitgymnasium
- ☐ 2. Klasse Langzeitgymnasium
- ☐ 3. Klasse Langzeitgymnasium/1. Klasse Kurzzeitgymnasium
- ☐ 4. Klasse Langzeitgymnasium/2. Klasse Kurzzeitgymnasium
- ☐ 5. Klasse Langzeitgymnasium/3. Klasse Kurzzeitgymnasium

☐ 6. Klasse Langzeitgymnasium/4. Klasse Kurzzeitgymnasium

**7 Welche Kantonsschule/Gymnasium besuchst Du?**

**Beantworten Sie diese Frage nur, wenn folgende Bedingungen erfüllt sind:**

Antwort war 'Mittelschule/Gymnasium' bei Frage 2 (Welche Schule besuchst Du?)

Bitte wählen Sie nur eine der folgenden Antworten aus:

- ☐ Kantonsschule Büelrain, Winterthur (KBW)
- ☐ Kantonsschule Enge (KEN)
- ☐ Kantonsschule Freudenberg (KFR)
- ☐ Kantonsschule Uster (KGL)
- ☐ Kantonsschule Hohe Promenade (KSHP)
- ☐ Kantonsschule Hottingen (KSH)
- ☐ Kantonsschule Im Lee (KLW)
- ☐ Kantonsschule Küsnacht (KSK)
- ☐ Kantonsschule Limmattal (KSL)
- ☐ Kantonsschule Zürich Nord (KZN)
- ☐ Kantonsschule Rychenberg (KRW)
- ☐ Kantonsschule Stadelhofen (KST)
- ☐ Kantonsschule Wiedikon (KWI)
- ☐ Kantonsschule Zürcher Oberland (KZO)
- ☐ Kantonsschule Zürcher Unterland (KZU)
- ☐ Liceo Artistico
- ☐ Literargymnasium Rämibühl (LG)
- ☐ Mathematisch-Naturwissenschaftliches Gymnasium Rämibühl (MNG)
- ☐ Realgymnasium Ramibühl (RG)
- ☐ Sonstiges

**8 Welches ist Dein Profil?**

**Beantworten Sie diese Frage nur, wenn folgende Bedingungen erfüllt sind:**

Antwort war 'Mittelschule/Gymnasium' bei Frage 2 (Welche Schule besuchst Du?)

Bitte wählen Sie nur eine der folgenden Antworten aus:

- ☐ Neusprachliches Profil (Englisch, Italienisch, Spanisch)
- ☐ Altsprachliches Profil (Latein, Griechisch)
- ☐ Wirtschaftliches Profil
- ☐ Mathematisch-naturwissenschaftliches Profil
- ☐ Musisches Profil
- ☐ Künstlerisches oder sportliches Profil

**9 Welche Berufsvorbereitungsschule besuchst Du?**

**Beantworten Sie diese Frage nur, wenn folgende Bedingungen erfüllt sind:**

Antwort war 'Berufsvorbereitungsschule/10. Schuljahr' bei Frage 2 (Welche Schule besuchst Du?)

Bitte wählen Sie nur eine der folgenden Antworten aus:

- ☐ Berufswahlschule Bülach

- ☐ Berufswahlschule Effretikon
- ☐ Berufswahlschule Bezirk Horgen
- ☐ Berufswahlschule Kloten
- ☐ Tempus – Berufsvorbereitung und Erwachsenenbildung am See, Küsnacht
- ☐ Berufswahlschule Limmattal
- ☐ Berufswahlschule Uster
- ☐ Berufswahl- und Weiterbildungsschule Zürcher Oberland, Wetzikon
- ☐ Berufswahlschule Winterthur
- ☐ Werkjahrschule Winterthur
- ☐ Hauswirtschaftliche Fortbildungsschule Winterthur
- ☐ Fachschule Viventa Zürich
- ☐ Sonstiges

### 10 Welches ist Dein Profil?

**Beantworten Sie diese Frage nur, wenn folgende Bedingungen erfüllt sind:**

Antwort war 'Berufsvorbereitungsschule/10. Schuljahr' bei Frage 2 (Welche Schule besuchst Du?)

Bitte wählen Sie nur eine der folgenden Antworten aus:

- ☐ BVJ Berufswahl Profil A
- ☐ BVJ Berufswahl Profil B
- ☐ Berufs(feld)orientierter Angebotstyp: BVJ Berufsfeld
- ☐ Berufs(feld)orientierter Angebotstyp: BVJ Vorlehre
- ☐ Integrationsorientierter Angebotstyp: BVJ Sprache und Kultur

## Demographische Angaben

### 11 Geschlecht

Bitte wählen Sie nur eine der folgenden Antworten aus:

- ☐ Weiblich
- ☐ Männlich

### 12 Wie alt bist Du?

In dieses Feld dürfen nur Zahlen eingegeben werden.

Bitte geben Sie Ihre Antwort hier ein:

### 13 In welchem Bezirk des Kantons Zürich wohnst Du?

Bitte wählen Sie nur eine der folgenden Antworten aus:

- ☐ Bezirk Affoltern
- ☐ Bezirk Andelfingen
- ☐ Bezirk Bülach
- ☐ Bezirk Dielsdorf
- ☐ Bezirk Dietikon

- ☐ Bezirk Hinwil
- ☐ Bezirk Horgen
- ☐ Bezirk Meilen
- ☐ Bezirk Pfäffikon
- ☐ Bezirk Uster
- ☐ Bezirk Winterthur
- ☐ Bezirk Zürich
- ☐ Sonstiges

**14 Welchen Schulabschluss hat dein Vater?**

Bitte wählen Sie nur eine der folgenden Antworten aus:

- ☐ keinen Schulabschluss
- ☐ Grundschule/Primarschule
- ☐ Abschluss an einer Sonderschule/Förderschule
- ☐ Sekundarabschluss
- ☐ Matura
- ☐ sonstiger Schulabschluss und zwar:
- ☐ Ich weiss es nicht
- ☐ Sonstiges

**15 Welchen Schulabschluss hat deine Mutter?**

Bitte wählen Sie nur eine der folgenden Antworten aus:

- ☐ keinen Schulabschluss
- ☐ Grundschule/Primarschule
- ☐ Abschluss an einer Sonderschule/Förderschule
- ☐ Sekundarabschluss
- ☐ Matura
- ☐ sonstiger Schulabschluss und zwar:
- ☐ Ich weiss es nicht
- ☐ Sonstiges

**16 Welche berufliche Ausbildung hat dein Vater?**

Bitte wählen Sie nur eine der folgenden Antworten aus:

- ☐ Keine abgeschlossene Ausbildung
- ☐ Abgeschlossene Lehre
- ☐ Fachhochschulabschluss
- ☐ Hochschulabschluss (Universitätsabschluss)
- ☐ Promotion (Doktorprüfung)
- ☐ Ich weiss es nicht
- ☐ Sonstiges

**17 Welche berufliche Ausbildung hat deine Mutter?**

Bitte wählen Sie nur eine der folgenden Antworten aus:

- ☐ Keine abgeschlossene Ausbildung
- ☐ Abgeschlossene Lehre
- ☐ Fachhochschulabschluss
- ☐ Hochschulabschluss (Universitätsabschluss)
- ☐ Promotion (Doktorprüfung)
- ☐ Ich weiss es nicht
- ☐ Sonstiges

**18 Welchen Beruf übt Dein Vater momentan aus?**

Bitte geben Sie Ihre Antwort hier ein:

**19 Welchen Beruf übt Deine Mutter momentan aus?**

Bitte geben Sie Ihre Antwort hier ein:

## **Einführung**

**20 Hast Du schon einmal davon gehört, dass man rezeptpflichtige Medikamente (wie zum Beispiel Ritalin®), psychoaktive Substanzen (wie zum Beispiel Cannabis, Kokain, Ecstasy etc.) und/oder andere Mittel (wie zum Beispiel Kaffee, Energy Drinks, Kaffee, Tabak etc.) konsumieren kann, um die Gehirnleistung zu verbessern (zum Beispiel um besser oder länger zu lernen, die Aufmerksamkeit zu steigern etc.)?**

Bitte wählen Sie nur eine der folgenden Antworten aus:

- ☐ Ja
- ☐ Nein

**21 Kennst Du Personen in deiner Schule, die rezeptpflichtige Medikamente (wie zum Beispiel Ritalin®) ohne medizinischen Grund einnehmen, um ihre Gehirnleistung für die Schule zu verbessern?**

**Beantworten Sie diese Frage nur, wenn folgende Bedingungen erfüllt sind:**

Antwort war 'Ja' bei Frage 20 (Hast Du schon einmal davon gehört, dass man rezeptpflichtige Medikamente (wie zum Beispiel Ritalin®), psychoaktive Substanzen (wie zum Beispiel Cannabis, Kokain, Ecstasy etc.) und/oder andere Mittel (wie zum Beispiel Kaffee, Energy Drinks, Kaffee, Tabak etc.) konsumieren kann, um die Gehirnleistung zu verbessern (zum Beispiel um besser oder länger zu lernen, die Aufmerksamkeit zu steigern etc.)?) )

Bitte wählen Sie nur eine der folgenden Antworten aus:

- ☐ Ja
- ☐ Nein

**22 Kennst Du Personen in deiner Schule, die psychoaktive Substanzen (wie zum Beispiel Cannabis, Kokain, Ecstasy etc.) konsumieren, um ihre Gehirnleistung für die Schule zu verbessern?**

Bitte wählen Sie nur eine der folgenden Antworten aus:

- ☐ Ja
- ☐ Nein

**23 Kennst Du Personen in deiner Schule, die sonstige Mittel (wie zum Beispiel Kaffee, Energy Drinks, Tabak etc.) konsumieren, um ihre Gehirnleistung für die Schule zu verbessern?**

Bitte wählen Sie nur eine der folgenden Antworten aus:

- ☐ Ja

☐ Nein

## Leistungsdruck und Stress

### 24 Wie stark verspürst Du in den folgenden Bereichen Leistungsdruck?

Bitte wählen Sie die zutreffende Antwort für jeden Punkt aus:

|                        | überhaupt nicht       | ein wenig             | ziemlich stark        | sehr stark            |
|------------------------|-----------------------|-----------------------|-----------------------|-----------------------|
| Schule                 | <input type="radio"/> | <input type="radio"/> | <input type="radio"/> | <input type="radio"/> |
| Lehre                  | <input type="radio"/> | <input type="radio"/> | <input type="radio"/> | <input type="radio"/> |
| Freizeit/ Hobby        | <input type="radio"/> | <input type="radio"/> | <input type="radio"/> | <input type="radio"/> |
| Familie                | <input type="radio"/> | <input type="radio"/> | <input type="radio"/> | <input type="radio"/> |
| Freunde und Partner/in | <input type="radio"/> | <input type="radio"/> | <input type="radio"/> | <input type="radio"/> |

### 25 Wie häufig hast Du dich in den letzten 12 Monaten gestresst gefühlt?

Bitte wählen Sie nur eine der folgenden Antworten aus:

- ☐ nie  
☐ selten  
☐ manchmal  
☐ häufig  
☐ sehr häufig

### 26 Wie häufig hast Du dich in den letzten 12 Monaten in folgenden Bereichen gestresst gefühlt?

Beantworten Sie diese Frage nur, wenn folgende Bedingungen erfüllt sind:

Antwort war 'selten' oder 'manchmal' oder 'häufig' oder 'sehr häufig' bei Frage 25 (Wie häufig hast Du dich in den letzten 12 Monaten gestresst gefühlt?)

Bitte wählen Sie die zutreffende Antwort für jeden Punkt aus:

|                        | nie                   | selten                | manchmal              | häufig                | sehr häufig           |
|------------------------|-----------------------|-----------------------|-----------------------|-----------------------|-----------------------|
| Schule                 | <input type="radio"/> |
| Lehre                  | <input type="radio"/> |
| Freizeit/ Hobby        | <input type="radio"/> |
| Familie                | <input type="radio"/> |
| Freunde und Partner/in | <input type="radio"/> |

### 27 Hast Du dich im Zusammenhang mit Deiner Schule schon einmal während mehreren Wochen gestresst gefühlt? Beachte, dass hier nur nach dem Bereich der Schule gefragt wird und nicht die Lehre gemeint ist.

Beantworten Sie diese Frage nur, wenn folgende Bedingungen erfüllt sind:

Antwort war 'sehr häufig' oder 'selten' oder 'manchmal' oder 'häufig' bei Frage 26 (Wie häufig hast Du dich in den letzten 12 Monaten in folgenden Bereichen gestresst gefühlt? (Schule))

Bitte wählen Sie nur eine der folgenden Antworten aus:

- ☐ Ja  
☐ Nein

### 28 Hast Du dich im Zusammenhang mit Deiner Lehre (Beruf) schon einmal während mehreren Wochen gestresst gefühlt?

Beantworten Sie diese Frage nur, wenn folgende Bedingungen erfüllt sind:

Antwort war 'Berufsfachschule/Lehre' bei Frage 2 (Welche Schule besuchst Du?) und Antwort war 'selten' oder

'manchmal' oder 'häufig' oder 'sehr häufig' bei Frage 26 (Wie häufig hast Du dich in den letzten 12 Monaten in folgenden Bereichen gestresst gefühlt? (Lehre))

Bitte wählen Sie nur eine der folgenden Antworten aus:

☐

Ja

☐

Nein

**29 Was sind Gründe warum Du dich in den letzten 12 Monaten in der Schule gestresst gefühlt hast?**

Bitte wählen Sie alle zutreffenden Antworten aus:

☐

Leistungsanforderungen

☐

Orientierungsproblem

☐

Konkurrenz unter Schüler/innen

☐

Gruppendruck

☐

Prüfungen

☐

Schriftliche Arbeiten und Referate

☐

Hausaufgaben

☐

Beteiligung an Diskussionen im Unterricht

☐

Bewältigung des Stoffumfangs

☐

Mich für meine Fächer zu begeistern

☐

Schwierigkeiten mit Lehrpersonen

☐

Ich habe mich in diesem Bereich nicht gestresst gefühlt

☐

Sonstiges:

**30 Was sind Gründe warum Du dich in den letzten 12 Monaten in der Lehre gestresst gefühlt hast?**

**Beantworten Sie diese Frage nur, wenn folgende Bedingungen erfüllt sind:**

Antwort war 'Berufsfachschule/Lehre' bei Frage 2 (Welche Schule besuchst Du?)

Bitte wählen Sie alle zutreffenden Antworten aus:

☐

Leistungsanforderungen

☐

Orientierungsproblem

☐

Konkurrenz unter Lernenden

☐

Gruppendruck

☐

Mich für meine Lehre zu begeistern

☐

Schwierigkeiten mit Berufsbildner/-in

☐

Ich habe mich in diesem Bereich nicht gestresst gefühlt

☐

Sonstiges:

**31 Was sind Gründe warum Du dich in den letzten 12 Monaten in privaten Bereichen (Freizeit/Hobby, Familie, Freunde etc.) gestresst gefühlt hast?**

Bitte wählen Sie alle zutreffenden Antworten aus:

☐

Finanzielle Probleme

☐

Eltern

☐

Freunde

☐

Partnerschaft

☐

Aussehen

- ☐ Ich habe mich in diesem Bereich nicht gestresst gefühlt
- ☐ Sonstiges:

**32 Wie oft ist es Dir möglich ohne den Konsum von Substanzen (zum Beispiel Alkohol, Medikamente etc.) Stress zu bewältigen respektive trotz Stress wieder abschalten zu können?**

Bitte wählen Sie nur eine der folgenden Antworten aus:

- ☐ nie
- ☐ selten
- ☐ manchmal
- ☐ häufig
- ☐ sehr häufig

**33 Die folgenden Fragen beschäftigen sich damit, wie häufig Du dich während der letzten 12 Monate durch Stress belastet fühltest.**

Bitte wählen Sie die zutreffende Antwort für jeden Punkt aus:

|                                                                                                                                                            | nie                   | selten                | manchmal              | häufig                | sehr oft              |
|------------------------------------------------------------------------------------------------------------------------------------------------------------|-----------------------|-----------------------|-----------------------|-----------------------|-----------------------|
| Wie oft hattest Du in den letzten 12 Monaten das Gefühl, wichtige Dinge in Deinem Leben nicht beeinflussen zu können?                                      | <input type="radio"/> |
| Wie oft hast Du Dich in den letzten 12 Monaten sicher im Umgang mit Deinen persönlichen Aufgaben und Problemen gefühlt?                                    | <input type="radio"/> |
| Wie oft hattest Du in den letzten 12 Monaten das Gefühl, dass sich die Dinge nach Deinen Vorstellungen entwickeln?                                         | <input type="radio"/> |
| Wie oft hattest Du in den letzten 12 Monaten das Gefühl, dass sich Aufgaben oder Probleme so sehr aufgestaut haben, dass Du diese nicht bewältigen kannst? | <input type="radio"/> |

**Zuversicht und Zufriedenheit**

**34 Wie zuversichtlich bist Du hinsichtlich folgender Bereiche deines Lebens?**

Bitte wählen Sie die zutreffende Antwort für jeden Punkt aus:

|                          | gar zuversichtlich    | nicht ein zuversichtlich | wenig zuversichtlich  | sehr zuversichtlich   |
|--------------------------|-----------------------|--------------------------|-----------------------|-----------------------|
| Schulischer Erfolg       | <input type="radio"/> | <input type="radio"/>    | <input type="radio"/> | <input type="radio"/> |
| Berufliche Zukunft       | <input type="radio"/> | <input type="radio"/>    | <input type="radio"/> | <input type="radio"/> |
| Persönliches Wohlergehen | <input type="radio"/> | <input type="radio"/>    | <input type="radio"/> | <input type="radio"/> |
| Finanzielles             | <input type="radio"/> | <input type="radio"/>    | <input type="radio"/> | <input type="radio"/> |

## Verhältnisse

### 35 Wie zufrieden bist Du zum jetzigen Zeitpunkt mit deiner Lebenssituation?

Bitte wählen Sie nur eine der folgenden Antworten aus:

- ☐ sehr unzufrieden
- ☐ eher unzufrieden
- ☐ zufrieden
- ☐ sehr zufrieden

### 36 Wie wichtig sind Dir Deine Leistungen in der Schule?

Bitte wählen Sie nur eine der folgenden Antworten aus:

- ☐ überhaupt nicht wichtig
- ☐ nicht wichtig
- ☐ wichtig
- ☐ sehr wichtig

### 37 Wie wichtig ist Dir die Schule allgemein?

Bitte wählen Sie nur eine der folgenden Antworten aus:

- ☐ überhaupt nicht wichtig
- ☐ nicht wichtig
- ☐ wichtig
- ☐ sehr wichtig

### 38 Wie wichtig ist Dir deine Lehre?

**Beantworten Sie diese Frage nur, wenn folgende Bedingungen erfüllt sind:**

Antwort war 'Berufsfachschule/Lehre' bei Frage 2 (Welche Schule besuchst Du?)

Bitte wählen Sie nur eine der folgenden Antworten aus:

- ☐ überhaupt nicht wichtig
- ☐ nicht wichtig
- ☐ wichtig
- ☐ sehr wichtig

## Konsum Medikamente

**39 Hast Du schon einmal in deinem Leben eines oder mehrere der unten aufgeführten Medikamente/Substanzen eingenommen, ohne dies aufgrund einer bestimmten Erkrankung zu tun und wenn ja als Freizeitkonsum<sup>1</sup> und/oder zur Leistungssteigerung<sup>2</sup>?**

<sup>1</sup> Freizeitkonsum betrifft den Konsum im Ausgang, an Parties, um länger tanzen/wach bleiben zu können, als Genussmittel oder zur Entspannung.

<sup>2</sup> Leistungssteigerung betrifft den Konsum mit der Absicht in der Schule oder im Beruf besser zu sein. Zum Beispiel, um in der Prüfungszeit bessere Leistungen zu erbringen, mit dem Schul- oder Arbeitsstress klarzukommen, um besser und länger lernen oder arbeiten zu können, oder um vor der Prüfung oder vor einem Stresstag besser schlafen und entspannen zu können.

Bitte wählen Sie die zutreffende Antwort für jeden Punkt aus:

nein                      nur                      Freizeit-                      nur zur Leistungs-                      Freizeitkonsum<sup>1</sup>

|                                                                                                                                                                                                                           |                       | konsum <sup>1</sup>   | steigerung <sup>2</sup> | UND Leistungs-<br>steigerung <sup>2</sup> |
|---------------------------------------------------------------------------------------------------------------------------------------------------------------------------------------------------------------------------|-----------------------|-----------------------|-------------------------|-------------------------------------------|
| <b>Methylphenidat</b> (zum Beispiel Ritalin®, Concerta®, Medikinet®, Focalin®, Strattera®)                                                                                                                                | <input type="radio"/> | <input type="radio"/> | <input type="radio"/>   | <input type="radio"/>                     |
| <b>Modafinil</b> (zum Beispiel Modasomil®)                                                                                                                                                                                | <input type="radio"/> | <input type="radio"/> | <input type="radio"/>   | <input type="radio"/>                     |
| <b>Hustenmittel</b>                                                                                                                                                                                                       | <input type="radio"/> | <input type="radio"/> | <input type="radio"/>   | <input type="radio"/>                     |
| <b>Aktivierende Antidepressiva</b> (zum Beispiel Edronax®, Wellbutrin®, Efexor®, Cymbalta®, Fluctine®/Fluoxetin®, Seropram®/Citalopram®, Cipralex®, Zoloft®/Sertralin®)                                                   | <input type="radio"/> | <input type="radio"/> | <input type="radio"/>   | <input type="radio"/>                     |
| <b>Antidementiva</b> (zum Beispiel Aricept®, Axura®, Reminyl®, Exelon®)                                                                                                                                                   | <input type="radio"/> | <input type="radio"/> | <input type="radio"/>   | <input type="radio"/>                     |
| <b>Beruhigungs- und Schlafmittel, Hypnotica</b> (zum Beispiel Remeron®, Sonata®, Stilnox®, Imovane®, Dalmadorm®, Noctamid®, Ergocalm Tabs®, Remestan®, Halcion®, Dolestan®, Chloraldurat 500®, Temesta®, Valium®, Xanax®) | <input type="radio"/> | <input type="radio"/> | <input type="radio"/>   | <input type="radio"/>                     |
| <b>Pflanzliche Beruhigungsmittel</b> (zum Beispiel Baldriparan®, Faros®, Jasin®, Remotiv®, Zeller Entspannung®, Zeller Herz-Nerven®, Johanniskraut)                                                                       | <input type="radio"/> | <input type="radio"/> | <input type="radio"/>   | <input type="radio"/>                     |
| <b>Betablocker</b> (zum Beispiel Beloc ZOK®, MetoZerok®, Inderal®)                                                                                                                                                        | <input type="radio"/> | <input type="radio"/> | <input type="radio"/>   | <input type="radio"/>                     |

**Stärkungsmittel,  
Nahrungsergänzung  
und Vitaminpräparate**

(zum Beispiel Berocca®,  
Dynamiasan®,  
Gincosan®, Strath®,  
Supradyn®,  
Tonoglutal®, Omega 3-  
Fettsäure-Präparate)

☐☐☐☐

**Methylphenidat in der Freizeit**

Diese Fragen betreffen deinen Konsum von **Methylphenidat** (zum Beispiel Ritalin®, Concerta®, Medikinet®, Focalin®, Strattera®) in der **Freizeit**

**40 Wie häufig hast Du diese Substanz in den letzten 12 Monaten in der Freizeit z.B. im Ausgang, an Parties etc. durchschnittlich verwendet?**

Bitte wählen Sie nur eine der folgenden Antworten aus:

☐

Täglich

☐

Wöchentlich

☐

Alle 14 Tage

☐

Monatlich

☐

1-2 Mal

☐

Nie

**41 Wie häufig hast Du diese Substanz in den letzten 30 Tagen in der Freizeit z.B. im Ausgang, an Parties etc. durchschnittlich verwendet?**

Bitte wählen Sie nur eine der folgenden Antworten aus:

☐

An 20 oder mehr Tagen

☐

An 10-19 Tagen

☐

An 4-9 Tagen

☐

An 1-3 Tagen

☐

Gar nicht

**Methylphenidat zur Verbesserung deiner Gehirnleistung**

Diese Fragen betreffen deinen Konsum von **Methylphenidat** (zum Beispiel Ritalin®, Concerta®, Medikinet®, Focalin®, Strattera®) zur **Verbesserung deiner Gehirnleistung**. Also um bessere Leistungen zu erbringen, mit dem Schul- oder Arbeitsstress klarzukommen, um besser und länger lernen oder arbeiten zu können oder um vor der Prüfung oder einem Stresstag besser schlafen und entspannen zu können?

**42 Wie häufig hast Du diese Substanz in den letzten 12 Monaten durchschnittlich verwendet, um deine Gehirnleistung für die Berufsvorbereitungsschule/Berufsfachschule/Kantonsschule zu verbessern?**

Bitte wählen Sie nur eine der folgenden Antworten aus:

☐

Täglich

☐

Wöchentlich

☐

Alle 14 Tage

- ☐ Monatlich
- ☐ 1-2 Mal
- ☐ Nie

**43 Wie häufig hast Du diese Substanz in den letzten 30 Tagen (ohne Urlaub) verwendet, um deine Gehirnleistung für die Berufsvorbereitungsschule/Berufsfachschule/Kantonsschule zu verbessern?**

Bitte wählen Sie nur eine der folgenden Antworten aus:

- ☐ An 20 oder mehr Tagen
- ☐ An 10-19 Tagen
- ☐ An 4-9 Tagen
- ☐ An 1-3 Tagen
- ☐ Gar nicht

**44 Was war der Grund für die Einnahme?**

Bitte wählen Sie alle zutreffenden Antworten aus:

- ☐ Wach bleiben/länger lernen
- ☐ Sich konzentrieren/Aufmerksam sein
- ☐ Gedächtnis verbessern
- ☐ High sein (Rausch erzeugen)
- ☐ Gefühl geniessen
- ☐ Mit dem Druck klar kommen
- ☐ Besser schlafen können
- ☐ Allgemeine Entspannung
- ☐ Noten verbessern
- ☐ Prüfungsangst während der Prüfung bekämpfen
- ☐ Weil andere es tun
- ☐ Sonstiges:

**45 Wurden Deine Erwartungen an die Wirkung der Substanz erfüllt?**

Bitte wählen Sie nur eine der folgenden Antworten aus:

- ☐ Ja
- ☐ Nein
- ☐ Teilweise
- ☐ Ich weiss nicht

**46 Würdest Du es in einer ähnlichen Situation wieder einnehmen?**

Bitte wählen Sie nur eine der folgenden Antworten aus:

- ☐ Ja
- ☐ Nein
- ☐ Vielleicht
- ☐ Ich weiss nicht

**Modafinil in der Freizeit**

Diese Fragen betreffen deinen Konsum von **Modafinil** (zum Beispiel Modasomil®) in der **Freizeit**

**47 Wie häufig hast Du diese Substanz in den letzten 12 Monaten in der Freizeit z.B. im Ausgang, an Parties etc. durchschnittlich verwendet?**

Bitte wählen Sie nur eine der folgenden Antworten aus:

- ☐ Täglich
- ☐ Wöchentlich
- ☐ Alle 14 Tage
- ☐ Monatlich
- ☐ 1-2 Mal
- ☐ Nie

**48 Wie häufig hast Du diese Substanz in den letzten 30 Tagen in der Freizeit z.B. im Ausgang, an Parties etc. durchschnittlich verwendet?**

Bitte wählen Sie nur eine der folgenden Antworten aus:

- ☐ An 20 oder mehr Tagen
- ☐ An 10-19 Tagen
- ☐ An 4-9 Tagen
- ☐ An 1-3 Tagen
- ☐ Gar nicht

**Modafinil zur Verbesserung deiner Gehirnleistung**

Diese Fragen betreffen deinen Konsum von **Modafinil** (zum Beispiel Modasomil®) zur **Verbesserung deiner Gehirnleistung**. Also um bessere Leistungen zu erbringen, mit dem Schul- oder Arbeitsstress klarzukommen, um besser und länger lernen oder arbeiten zu können oder um vor der Prüfung oder einem Stresstag besser schlafen und entspannen zu können?

**49 Wie häufig hast Du diese Substanz in den letzten 12 Monaten durchschnittlich verwendet, um deine Gehirnleistung für die Berufsvorbereitungsschule/Berufsfachschule/Kantonsschule zu verbessern?**

Bitte wählen Sie nur eine der folgenden Antworten aus:

- ☐ Täglich
- ☐ Wöchentlich
- ☐ Alle 14 Tage
- ☐ Monatlich
- ☐ 1-2 Mal
- ☐ Nie

**50 Wie häufig hast Du diese Substanz in den letzten 30 Tagen (ohne Urlaub) verwendet, um deine Gehirnleistung für die Berufsvorbereitungsschule/Berufsfachschule/Kantonsschule zu verbessern?**

Bitte wählen Sie nur eine der folgenden Antworten aus:

- ☐ An 20 oder mehr Tagen
- ☐ An 10-19 Tagen
- ☐ An 4-9 Tagen

- ☐ An 1-3 Tagen  
☐ Gar nicht

**51 Was war der Grund für die Einnahme?**

Bitte wählen Sie alle zutreffenden Antworten aus:

- ☐ Wach bleiben/länger lernen  
☐ Sich konzentrieren/Aufmerksam sein  
☐ Gedächtnis verbessern  
☐ High sein (Rausch erzeugen)  
☐ Gefühl geniessen  
☐ Mit dem Druck klar kommen  
☐ Besser schlafen können  
☐ Allgemeine Entspannung  
☐ Noten verbessern  
☐ Prüfungsangst während der Prüfung bekämpfen  
☐ Weil andere es tun  
☐ Sonstiges:

**52 Wurden Deine Erwartungen an die Wirkung der Substanz erfüllt?**

Bitte wählen Sie nur eine der folgenden Antworten aus:

- ☐ Ja  
☐ Nein  
☐ Teilweise  
☐ Ich weiss nicht

**53 Würdest Du es in einer ähnlichen Situation wieder einnehmen?**

Bitte wählen Sie nur eine der folgenden Antworten aus:

- ☐ Ja  
☐ Nein  
☐ Vielleicht  
☐ Ich weiss nicht

**Hustenmittel in der Freizeit**

Diese Fragen betreffen deinen Konsum von **Hustenmittel** in der **Freizeit**.

**54 Wie häufig hast Du diese Substanz in den letzten 12 Monaten in der Freizeit z.B. im Ausgang, an Parties etc. durchschnittlich verwendet?**

Bitte wählen Sie nur eine der folgenden Antworten aus:

- ☐ Täglich  
☐ Wöchentlich  
☐ Alle 14 Tage  
☐ Monatlich

- ☐ 1-2 Mal  
☐ Nie

**55 Wie häufig hast Du diese Substanz in den letzten 30 Tagen in der Freizeit z.B. im Ausgang, an Parties etc. durchschnittlich verwendet?**

Bitte wählen Sie nur eine der folgenden Antworten aus:

- ☐ An 20 oder mehr Tagen  
☐ An 10-19 Tagen  
☐ An 4-9 Tagen  
☐ An 1-3 Tagen  
☐ Gar nicht

### **Hustenmittel zur Verbesserung deiner Gehirnleistung**

Diese Fragen betreffen deinen Konsum von **Hustenmittel zur Verbesserung deiner Gehirnleistung**. Also um bessere Leistungen zu erbringen, mit dem Schul- oder Arbeitsstress klarzukommen, um besser und länger lernen oder arbeiten zu können oder um vor der Prüfung oder einem Stresstag besser schlafen und entspannen zu können?

**56 Wie häufig hast Du diese Substanz in den letzten 12 Monaten durchschnittlich verwendet, um deine Gehirnleistung für die Berufsvorbereitungsschule/Berufsfachschule/Kantonsschule zu verbessern?**

Bitte wählen Sie nur eine der folgenden Antworten aus:

- ☐ Täglich  
☐ Wöchentlich  
☐ Alle 14 Tage  
☐ Monatlich  
☐ 1-2 Mal  
☐ Nie

**57 Wie häufig hast Du diese Substanz in den letzten 30 Tagen (ohne Urlaub) verwendet, um deine Gehirnleistung für die Berufsvorbereitungsschule/Berufsfachschule/Kantonsschule zu verbessern?**

Bitte wählen Sie nur eine der folgenden Antworten aus:

- ☐ An 20 oder mehr Tagen  
☐ An 10-19 Tagen  
☐ An 4-9 Tagen  
☐ An 1-3 Tagen  
☐ Gar nicht

**58 Was war der Grund für die Einnahme?**

Bitte wählen Sie alle zutreffenden Antworten aus:

- ☐ Wach bleiben/länger lernen  
☐ Sich konzentrieren/Aufmerksam sein  
☐ Gedächtnis verbessern  
☐ High sein (Rausch erzeugen)

- ☐ Gefühl genießen
- ☐ Mit dem Druck klar kommen
- ☐ Besser schlafen können
- ☐ Allgemeine Entspannung
- ☐ Noten verbessern
- ☐ Prüfungsangst während der Prüfung bekämpfen
- ☐ Weil andere es tun
- ☐ Sonstiges:

**59 Wurden Deine Erwartungen an die Wirkung der Substanz erfüllt?**

Bitte wählen Sie nur eine der folgenden Antworten aus:

- ☐ Ja
- ☐ Nein
- ☐ Teilweise
- ☐ Ich weiss nicht

**60 Würdest Du es in einer ähnlichen Situation wieder einnehmen?**

Bitte wählen Sie nur eine der folgenden Antworten aus:

- ☐ Ja
- ☐ Nein
- ☐ Vielleicht
- ☐ Ich weiss nicht

**Aktivierende Antidepressiva in der Freizeit**

Diese Fragen betreffen deinen Konsum von **aktivierenden Antidepressiva** (zum Beispiel Edronax®, Wellbutrin®, Efexor®, Cymbalta®, Fluctine®/Fluoxetin®, Seropram®/Citalopram®, Cipralex®, Zoloft®/Sertralin®) in der **Freizeit**

**61 Wie häufig hast Du diese Substanz in den letzten 12 Monaten in der Freizeit z.B. im Ausgang, an Parties etc. durchschnittlich verwendet?**

Bitte wählen Sie nur eine der folgenden Antworten aus:

- ☐ Täglich
- ☐ Wöchentlich
- ☐ Alle 14 Tage
- ☐ Monatlich
- ☐ 1-2 Mal
- ☐ Nie

**62 Wie häufig hast Du diese Substanz in den letzten 30 Tagen in der Freizeit z.B. im Ausgang, an Parties etc. durchschnittlich verwendet?**

Bitte wählen Sie nur eine der folgenden Antworten aus:

- ☐ An 20 oder mehr Tagen
- ☐ An 10-19 Tagen

- ☐ An 4-9 Tagen  
☐ An 1-3 Tagen  
☐ Gar nicht

### **Aktivierende Antidepressiva zur Verbesserung deiner Gehirnleistung**

Diese Fragen betreffen deinen Konsum von **aktivierenden Antidepressiva** (zum Beispiel Edronax®, Wellbutrin®, Efexor®, Cymbalta®, Fluctine®/Fluoxetin®, Seropram®/Citalopram®, Cipralex®, Zoloft®/Sertralin®) zur **Verbesserung deiner Gehirnleistung**. Also um bessere Leistungen zu erbringen, mit dem Schul- oder Arbeitsstress klarzukommen, um besser und länger lernen oder arbeiten zu können oder um vor der Prüfung oder einem Stresstag besser schlafen und entspannen zu können?

**63 Wie häufig hast Du diese Substanz in den letzten 12 Monaten durchschnittlich verwendet, um deine Gehirnleistung für die Berufsvorbereitungsschule/Berufsfachschule/Kantonsschule zu verbessern?**

Bitte wählen Sie nur eine der folgenden Antworten aus:

- ☐ Täglich  
☐ Wöchentlich  
☐ Alle 14 Tage  
☐ Monatlich  
☐ 1-2 Mal  
☐ Nie

**64 Wie häufig hast Du diese Substanz in den letzten 30 Tagen (ohne Urlaub) verwendet, um deine Gehirnleistung für die Berufsvorbereitungsschule/Berufsfachschule/Kantonsschule zu verbessern?**

Bitte wählen Sie nur eine der folgenden Antworten aus:

- ☐ An 20 oder mehr Tagen  
☐ An 10-19 Tagen  
☐ An 4-9 Tagen  
☐ An 1-3 Tagen  
☐ Gar nicht

**65 Was war der Grund für die Einnahme?**

Bitte wählen Sie alle zutreffenden Antworten aus:

- ☐ Wach bleiben/länger lernen  
☐ Sich konzentrieren/Aufmerksam sein  
☐ Gedächtnis verbessern  
☐ High sein (Rausch erzeugen)  
☐ Gefühl geniessen  
☐ Mit dem Druck klar kommen  
☐ Besser schlafen können  
☐ Allgemeine Entspannung  
☐ Noten verbessern  
☐ Prüfungsangst während der Prüfung bekämpfen  
☐ Weil andere es tun

☐ Sonstiges:

**66 Wurden Deine Erwartungen an die Wirkung der Substanz erfüllt?**

Bitte wählen Sie nur eine der folgenden Antworten aus:

- ☐ Ja  
☐ Nein  
☐ Teilweise  
☐ Ich weiss nicht

**67 Würdest Du es in einer ähnlichen Situation wieder einnehmen?**

Bitte wählen Sie nur eine der folgenden Antworten aus:

- ☐ Ja  
☐ Nein  
☐ Vielleicht  
☐ Ich weiss nicht

**Antidementiva in der Freizeit**

Diese Fragen betreffen deinen Konsum von **Antidementiva** (zum Beispiel Aricept®, Axura®, Reminyl®, Exelon®) in der **Freizeit**

**68 Wie häufig hast Du diese Substanz in den letzten 12 Monaten in der Freizeit z.B. im Ausgang, an Parties etc. durchschnittlich verwendet?**

Bitte wählen Sie nur eine der folgenden Antworten aus:

- ☐ Täglich  
☐ Wöchentlich  
☐ Alle 14 Tage  
☐ Monatlich  
☐ 1-2 Mal  
☐ Nie

**69 Wie häufig hast Du diese Substanz in den letzten 30 Tagen in der Freizeit z.B. im Ausgang, an Parties etc. durchschnittlich verwendet?**

Bitte wählen Sie nur eine der folgenden Antworten aus:

- ☐ An 20 oder mehr Tagen  
☐ An 10-19 Tagen  
☐ An 4-9 Tagen  
☐ An 1-3 Tagen  
☐ Gar nicht

**Antidementiva zur Verbesserung deiner Gehirnleistung**

Diese Fragen betreffen deinen Konsum von **Antidementiva** (zum Beispiel Aricept®, Axura®, Reminyl®, Exelon®) zur **Verbesserung deiner Gehirnleistung**. Also um bessere Leistungen zu erbringen, mit dem Schul- oder Arbeitsstress klarzukommen, um besser und länger lernen oder arbeiten zu können oder um vor der Prüfung

oder einem Stresstag besser schlafen und entspannen zu können?

**70 Wie häufig hast Du diese Substanz in den letzten 12 Monaten durchschnittlich verwendet, um deine Gehirnleistung für die Berufsvorbereitungsschule/Berufsfachschule/Kantonsschule zu verbessern?**

Bitte wählen Sie nur eine der folgenden Antworten aus:

- ☐ Täglich
- ☐ Wöchentlich
- ☐ Alle 14 Tage
- ☐ Monatlich
- ☐ 1-2 Mal
- ☐ Nie

**71 Wie häufig hast Du diese Substanz in den letzten 30 Tagen (ohne Urlaub) verwendet, um deine Gehirnleistung für die Berufsvorbereitungsschule/Berufsfachschule/Kantonsschule zu verbessern?**

Bitte wählen Sie nur eine der folgenden Antworten aus:

- ☐ An 20 oder mehr Tagen
- ☐ An 10-19 Tagen
- ☐ An 4-9 Tagen
- ☐ An 1-3 Tagen
- ☐ Gar nicht

**72 Was war der Grund für die Einnahme?**

Bitte wählen Sie alle zutreffenden Antworten aus:

- ☐ Wach bleiben/länger lernen
- ☐ Sich konzentrieren/Aufmerksam sein
- ☐ Gedächtnis verbessern
- ☐ High sein (Rausch erzeugen)
- ☐ Gefühl geniessen
- ☐ Mit dem Druck klar kommen
- ☐ Besser schlafen können
- ☐ Allgemeine Entspannung
- ☐ Noten verbessern
- ☐ Prüfungsangst während der Prüfung bekämpfen
- ☐ Weil andere es tun
- ☐ Sonstiges:

**73 Wurden Deine Erwartungen an die Wirkung der Substanz erfüllt?**

Bitte wählen Sie nur eine der folgenden Antworten aus:

- ☐ Ja
- ☐ Nein
- ☐ Teilweise
- ☐ Ich weiss nicht

**74 Würdest Du es in einer ähnlichen Situation wieder einnehmen?**

Bitte wählen Sie nur eine der folgenden Antworten aus:

- ☐ Ja  
☐ Nein  
☐ Vielleicht  
☐ Ich weiss nicht

**Beruhigungs- und Schlafmittel, Hypnotica in der Freizeit**

Diese Fragen betreffen deinen Konsum von **Beruhigungs- und Schlafmittel, Hypnotica** (zum Beispiel Remeron®, Sonata®, Stilnox®, Imovane®, Dalmadorm®, Noctamid®, Ergocalm Tabs®, Remestan®, Halcion®, Dolestan®, Chloraldurat 500®, Temesta®, Valium®, Xanax®) in der **Freizeit**

**75 Wie häufig hast Du diese Substanz in den letzten 12 Monaten in der Freizeit z.B. im Ausgang, an Parties etc. durchschnittlich verwendet?**

Bitte wählen Sie nur eine der folgenden Antworten aus:

- ☐ Täglich  
☐ Wöchentlich  
☐ Alle 14 Tage  
☐ Monatlich  
☐ 1-2 Mal  
☐ Nie

**76 Wie häufig hast Du diese Substanz in den letzten 30 Tagen in der Freizeit z.B. im Ausgang, an Parties etc. durchschnittlich verwendet?**

Bitte wählen Sie nur eine der folgenden Antworten aus:

- ☐ An 20 oder mehr Tagen  
☐ An 10-19 Tagen  
☐ An 4-9 Tagen  
☐ An 1-3 Tagen  
☐ Gar nicht

**Beruhigungs- und Schlafmittel, Hypnotica zur Verbesserung deiner Gehirnleistung**

Diese Fragen betreffen deinen Konsum von **Beruhigungs- und Schlafmittel, Hypnotica** (zum Beispiel Remeron®, Sonata®, Stilnox®, Imovane®, Dalmadorm®, Noctamid®, Ergocalm Tabs®, Remestan®, Halcion®, Dolestan®, Chloraldurat 500®, Temesta®, Valium®, Xanax®) zur **Verbesserung deiner Gehirnleistung**. Also um bessere Leistungen zu erbringen, mit dem Schul- oder Arbeitsstress klarzukommen, um besser und länger lernen oder arbeiten zu können oder um vor der Prüfung oder einem Stresstag besser schlafen und entspannen zu können?

**77 Wie häufig hast Du diese Substanz in den letzten 12 Monaten durchschnittlich verwendet, um deine Gehirnleistung für die Berufsvorbereitungsschule/Berufsfachschule/Kantonsschule zu verbessern?**

Bitte wählen Sie nur eine der folgenden Antworten aus:

- ☐ Täglich  
☐ Wöchentlich

- ☐ Alle 14 Tage
- ☐ Monatlich
- ☐ 1-2 Mal
- ☐ Nie

**78 Wie häufig hast Du diese Substanz in den letzten 30 Tagen (ohne Urlaub) verwendet, um deine Gehirnleistung für die Berufsvorbereitungsschule/Berufsfachschule/Kantonsschule zu verbessern?**

Bitte wählen Sie nur eine der folgenden Antworten aus:

- ☐ An 20 oder mehr Tagen
- ☐ An 10-19 Tagen
- ☐ An 4-9 Tagen
- ☐ An 1-3 Tagen
- ☐ Gar nicht

**79 Was war der Grund für die Einnahme?**

Bitte wählen Sie alle zutreffenden Antworten aus:

- ☐ Wach bleiben/länger lernen
- ☐ Sich konzentrieren/Aufmerksam sein
- ☐ Gedächtnis verbessern
- ☐ High sein (Rausch erzeugen)
- ☐ Gefühl geniessen
- ☐ Mit dem Druck klar kommen
- ☐ Besser schlafen können
- ☐ Allgemeine Entspannung
- ☐ Noten verbessern
- ☐ Prüfungsangst während der Prüfung bekämpfen
- ☐ Weil andere es tun
- ☐ Sonstiges:

**80 Wurden Deine Erwartungen an die Wirkung der Substanz erfüllt?**

Bitte wählen Sie nur eine der folgenden Antworten aus:

- ☐ Ja
- ☐ Nein
- ☐ Teilweise
- ☐ Ich weiss nicht

**81 Würdest Du es in einer ähnlichen Situation wieder einnehmen?**

Bitte wählen Sie nur eine der folgenden Antworten aus:

- ☐ Ja
- ☐ Nein
- ☐ Vielleicht
- ☐ Ich weiss nicht

## Pflanzliche Beruhigungsmittel in der Freizeit

Diese Fragen betreffen deinen Konsum von **Pflanzliche Beruhigungsmittel** (zum Beispiel Baldriparan®, Faros®, Jasin®, Remotiv®, Zeller Entspannung®, Zeller Herz-Nerven®, Johanniskraut) in der **Freizeit**

**82 Wie häufig hast Du diese Substanz in den letzten 12 Monaten in der Freizeit z.B. im Ausgang, an Parties etc. durchschnittlich verwendet?**

Bitte wählen Sie nur eine der folgenden Antworten aus:

- ☐ Täglich
- ☐ Wöchentlich
- ☐ Alle 14 Tage
- ☐ Monatlich
- ☐ 1-2 Mal
- ☐ Nie

**83 Wie häufig hast Du diese Substanz in den letzten 30 Tagen in der Freizeit z.B. im Ausgang, an Parties etc. durchschnittlich verwendet?**

Bitte wählen Sie nur eine der folgenden Antworten aus:

- ☐ An 20 oder mehr Tagen
- ☐ An 10-19 Tagen
- ☐ An 4-9 Tagen
- ☐ An 1-3 Tagen
- ☐ Gar nicht

## Pflanzliche Beruhigungsmittel zur Verbesserung deiner Gehirnleistung

Diese Fragen betreffen deinen Konsum von **Pflanzliche Beruhigungsmittel** (zum Beispiel Baldriparan®, Faros®, Jasin®, Remotiv®, Zeller Entspannung®, Zeller Herz-Nerven®, Johanniskraut) zur **Verbesserung deiner Gehirnleistung**. Also um bessere Leistungen zu erbringen, mit dem Schul- oder Arbeitsstress klarzukommen, um besser und länger lernen oder arbeiten zu können oder um vor der Prüfung oder einem Stresstag besser schlafen und entspannen zu können?

**84 Wie häufig hast Du diese Substanz in den letzten 12 Monaten durchschnittlich verwendet, um deine Gehirnleistung für die Berufsvorbereitungsschule/Berufsfachschule/Kantonsschule zu verbessern?**

Bitte wählen Sie nur eine der folgenden Antworten aus:

- ☐ Täglich
- ☐ Wöchentlich
- ☐ Alle 14 Tage
- ☐ Monatlich
- ☐ 1-2 Mal
- ☐ Nie

**85 Wie häufig hast Du diese Substanz in den letzten 30 Tagen (ohne Urlaub) verwendet, um deine Gehirnleistung für die Berufsvorbereitungsschule/Berufsfachschule/Kantonsschule zu verbessern?**

Bitte wählen Sie nur eine der folgenden Antworten aus:

- ☐ An 20 oder mehr Tagen

- ☐ An 10-19 Tagen  
☐ An 4-9 Tagen  
☐ An 1-3 Tagen  
☐ Gar nicht

**86 Was war der Grund für die Einnahme?**

Bitte wählen Sie alle zutreffenden Antworten aus:

- ☐ Wach bleiben/länger lernen  
☐ Sich konzentrieren/Aufmerksam sein  
☐ Gedächtnis verbessern  
☐ High sein (Rausch erzeugen)  
☐ Gefühl geniessen  
☐ Mit dem Druck klar kommen  
☐ Besser schlafen können  
☐ Allgemeine Entspannung  
☐ Noten verbessern  
☐ Prüfungsangst während der Prüfung bekämpfen  
☐ Weil andere es tun  
☐ Sonstiges:

**87 Wurden Deine Erwartungen an die Wirkung der Substanz erfüllt?**

Bitte wählen Sie nur eine der folgenden Antworten aus:

- ☐ Ja  
☐ Nein  
☐ Teilweise  
☐ Ich weiss nicht

**88 Würdest Du es in einer ähnlichen Situation wieder einnehmen?**

Bitte wählen Sie nur eine der folgenden Antworten aus:

- ☐ Ja  
☐ Nein  
☐ Vielleicht  
☐ Ich weiss nicht

**Betablocker in der Freizeit**

Diese Fragen betreffen deinen Konsum von **Betablocker** (zum Beispiel Beloc ZOK®, MetoZerok®, Inderal®) in der **Freizeit**

**89 Wie häufig hast Du diese Substanz in den letzten 12 Monaten in der Freizeit z.B. im Ausgang, an Parties etc. durchschnittlich verwendet?**

Bitte wählen Sie nur eine der folgenden Antworten aus:

- ☐ Täglich

- ☐ Wöchentlich
- ☐ Alle 14 Tage
- ☐ Monatlich
- ☐ 1-2 Mal
- ☐ Nie

**90 Wie häufig hast Du diese Substanz in den letzten 30 Tagen in der Freizeit z.B. im Ausgang, an Parties etc. durchschnittlich verwendet?**

Bitte wählen Sie nur eine der folgenden Antworten aus:

- ☐ An 20 oder mehr Tagen
- ☐ An 10-19 Tagen
- ☐ An 4-9 Tagen
- ☐ An 1-3 Tagen
- ☐ Gar nicht

### **Betablocker zur Verbesserung deiner Gehirnleistung**

Diese Fragen betreffen deinen Konsum von **Betablocker** (zum Beispiel Beloc ZOK®, MetoZerok®, Inderal®) zur **Verbesserung deiner Gehirnleistung**. Also um bessere Leistungen zu erbringen, mit dem Schul- oder Arbeitsstress klarzukommen, um besser und länger lernen oder arbeiten zu können oder um vor der Prüfung oder einem Stresstag besser schlafen und entspannen zu können?

**91 Wie häufig hast Du diese Substanz in den letzten 12 Monaten durchschnittlich verwendet, um deine Gehirnleistung für die Berufsvorbereitungsschule/Berufsfachschule/Kantonsschule zu verbessern?**

Bitte wählen Sie nur eine der folgenden Antworten aus:

- ☐ Täglich
- ☐ Wöchentlich
- ☐ Alle 14 Tage
- ☐ Monatlich
- ☐ 1-2 Mal
- ☐ Nie

**92 Wie häufig hast Du diese Substanz in den letzten 30 Tagen (ohne Urlaub) verwendet, um deine Gehirnleistung für die Berufsvorbereitungsschule/Berufsfachschule/Kantonsschule zu verbessern?**

Bitte wählen Sie nur eine der folgenden Antworten aus:

- ☐ An 20 oder mehr Tagen
- ☐ An 10-19 Tagen
- ☐ An 4-9 Tagen
- ☐ An 1-3 Tagen
- ☐ Gar nicht

**93 Was war der Grund für die Einnahme?**

Bitte wählen Sie alle zutreffenden Antworten aus:

- ☐ Wach bleiben/länger lernen

- ☐ Sich konzentrieren/Aufmerksam sein
- ☐ Gedächtnis verbessern
- ☐ High sein (Rausch erzeugen)
- ☐ Gefühl genießen
- ☐ Mit dem Druck klar kommen
- ☐ Besser schlafen können
- ☐ Allgemeine Entspannung
- ☐ Noten verbessern
- ☐ Prüfungsangst während der Prüfung bekämpfen
- ☐ Weil andere es tun
- ☐ Sonstiges:

**94 Wurden Deine Erwartungen an die Wirkung der Substanz erfüllt?**

Bitte wählen Sie nur eine der folgenden Antworten aus:

- ☐ Ja
- ☐ Nein
- ☐ Teilweise
- ☐ Ich weiss nicht

**95 Würdest Du es in einer ähnlichen Situation wieder einnehmen?**

Bitte wählen Sie nur eine der folgenden Antworten aus:

- ☐ Ja
- ☐ Nein
- ☐ Vielleicht
- ☐ Ich weiss nicht

**Stärkungsmittel, Nahrungsergänzung und Vitaminpräparate in der Freizeit**

Diese Fragen betreffen deinen Konsum von **Stärkungsmittel, Nahrungsergänzung und Vitaminpräparate** (zum Beispiel Berocca®, Dynamiasan®, Gincosan®, Strath®, Supradyn®, Tonoglutal®, Omega 3-Fettsäure-Präparate) in der **Freizeit**

**96 Wie häufig hast Du diese Substanz in den letzten 12 Monaten in der Freizeit z.B. im Ausgang, an Parties etc. durchschnittlich verwendet?**

Bitte wählen Sie nur eine der folgenden Antworten aus:

- ☐ Täglich
- ☐ Wöchentlich
- ☐ Alle 14 Tage
- ☐ Monatlich
- ☐ 1-2 Mal
- ☐ Nie

**97 Wie häufig hast Du diese Substanz in den letzten 30 Tagen in der Freizeit z.B. im Ausgang, an Parties**

**etc. durchschnittlich verwendet?**

Bitte wählen Sie nur eine der folgenden Antworten aus:

- ☐ An 20 oder mehr Tagen  
☐ An 10-19 Tagen  
☐ An 4-9 Tagen  
☐ An 1-3 Tagen  
☐ Gar nicht

**Stärkungsmittel, Nahrungsergänzung und Vitaminpräparate zur Verbesserung deiner Gehirnleistung**

Diese Fragen betreffen deinen Konsum von **Stärkungsmittel, Nahrungsergänzung und Vitaminpräparaten** (zum Beispiel Berocca®, Dynamiasan®, Gincosan®, Strath®, Supradyn®, Tonoglutal®, Omega 3-Fettsäure-Präparate) zur **Verbesserung deiner Gehirnleistung**. Also um bessere Leistungen zu erbringen, mit dem Schul- oder Arbeitsstress klarzukommen, um besser und länger lernen oder arbeiten zu können oder um vor der Prüfung oder einem Stresstag besser schlafen und entspannen zu können?

**98 Wie häufig hast Du diese Substanz in den letzten 12 Monaten durchschnittlich verwendet, um deine Gehirnleistung für die Berufsvorbereitungsschule/Berufsfachschule/Kantonsschule zu verbessern?**

Bitte wählen Sie nur eine der folgenden Antworten aus:

- ☐ Täglich  
☐ Wöchentlich  
☐ Alle 14 Tage  
☐ Monatlich  
☐ 1-2 Mal  
☐ Nie

**99 Wie häufig hast Du diese Substanz in den letzten 30 Tagen (ohne Urlaub) verwendet, um deine Gehirnleistung für die Berufsvorbereitungsschule/Berufsfachschule/Kantonsschule zu verbessern?**

Bitte wählen Sie nur eine der folgenden Antworten aus:

- ☐ An 20 oder mehr Tagen  
☐ An 10-19 Tagen  
☐ An 4-9 Tagen  
☐ An 1-3 Tagen  
☐ Gar nicht

**100 Was war der Grund für die Einnahme?**

Bitte wählen Sie alle zutreffenden Antworten aus:

- ☐ Wach bleiben/länger lernen  
☐ Sich konzentrieren/Aufmerksam sein  
☐ Gedächtnis verbessern  
☐ High sein (Rausch erzeugen)  
☐ Gefühl geniessen  
☐ Mit dem Druck klar kommen

- ☐ Besser schlafen können
- ☐ Allgemeine Entspannung
- ☐ Noten verbessern
- ☐ Prüfungsangst während der Prüfung bekämpfen
- ☐ Weil andere es tun
- ☐ Sonstiges:

**101 Wurden Deine Erwartungen an die Wirkung der Substanz erfüllt?**

Bitte wählen Sie nur eine der folgenden Antworten aus:

- ☐ Ja
- ☐ Nein
- ☐ Teilweise
- ☐ Ich weiss nicht

**102 Würdest Du es in einer ähnlichen Situation wieder einnehmen?**

Bitte wählen Sie nur eine der folgenden Antworten aus:

- ☐ Ja
- ☐ Nein
- ☐ Vielleicht
- ☐ Ich weiss nicht

**Konsum psychoaktive Substanzen**

**103 Hast Du schon einmal in deinem Leben eines oder mehrere der unten aufgeführten psychoaktiven Substanzen eingenommen, und wenn ja als *Freizeitkonsum*<sup>1</sup> und/oder zur *Leistungssteigerung*<sup>2</sup>?**

<sup>1</sup> Freizeitkonsum betrifft den Konsum im Ausgang, an Parties, um länger tanzen/wach bleiben zu können, als Genussmittel oder zur Entspannung.

<sup>2</sup> Leistungssteigerung betrifft den Konsum mit der Absicht in der Schule oder im Beruf besser zu sein. Zum Beispiel, um in der Prüfungszeit bessere Leistungen zu erbringen, mit dem Schul- oder Arbeitsstress klarzukommen, um besser und länger lernen oder arbeiten zu können, oder um vor der Prüfung oder vor einem Stresstag besser schlafen und entspannen zu können.

Bitte wählen Sie die zutreffende Antwort für jeden Punkt aus:

|                                                                                              | nein                  | nur<br>Freizeit-<br>konsum <sup>1</sup> | nur zur Leistungs-<br>steigerung <sup>2</sup> | Freizeitkonsum <sup>1</sup><br>UND Leistungs-<br>steigerung <sup>2</sup> |
|----------------------------------------------------------------------------------------------|-----------------------|-----------------------------------------|-----------------------------------------------|--------------------------------------------------------------------------|
| <b>Alkohol</b>                                                                               | <input type="radio"/> | <input type="radio"/>                   | <input type="radio"/>                         | <input type="radio"/>                                                    |
| <b>Tabak</b> (zum<br>Beispiel Zigaretten,<br>Zigarren, Pfeife,<br>Schnupftabak,<br>Kautabak) | <input type="radio"/> | <input type="radio"/>                   | <input type="radio"/>                         | <input type="radio"/>                                                    |
| <b>Hanfprodukte</b><br>(zum Beispiel<br>Cannabis)                                            | <input type="radio"/> | <input type="radio"/>                   | <input type="radio"/>                         | <input type="radio"/>                                                    |

(Marihuana),  
Hasch, Haschöl)

|                                                                                    |                       |                       |                       |                       |
|------------------------------------------------------------------------------------|-----------------------|-----------------------|-----------------------|-----------------------|
| <b>Kokain</b>                                                                      | <input type="radio"/> | <input type="radio"/> | <input type="radio"/> | <input type="radio"/> |
| <b>Amphetamine</b><br>(Speed)                                                      | <input type="radio"/> | <input type="radio"/> | <input type="radio"/> | <input type="radio"/> |
| <b>Ecstasy (MDMA)</b>                                                              | <input type="radio"/> | <input type="radio"/> | <input type="radio"/> | <input type="radio"/> |
| <b>Kaffee</b>                                                                      | <input type="radio"/> | <input type="radio"/> | <input type="radio"/> | <input type="radio"/> |
| <b>Koffeintabletten</b><br>(zum Beispiel<br>Coffeinum N®,<br>Percoffedrinol®)      | <input type="radio"/> | <input type="radio"/> | <input type="radio"/> | <input type="radio"/> |
| <b>Energy Drinks</b><br>(zum Beispiel Red<br>Bull®,<br>guaranahaltige<br>Getränke) | <input type="radio"/> | <input type="radio"/> | <input type="radio"/> | <input type="radio"/> |
| <b>Andere</b>                                                                      | <input type="radio"/> | <input type="radio"/> | <input type="radio"/> | <input type="radio"/> |

## Alkohol in der Freizeit

Diese Fragen betreffen deinen Konsum von **Alkohol** in der **Freizeit**, zum Beispiel im Ausgang oder auf Partys.

**104 Wie häufig hast Du diese Substanz in den letzten 12 Monaten in der Freizeit z.B. im Ausgang, an Parties etc. durchschnittlich verwendet?**

Bitte wählen Sie nur eine der folgenden Antworten aus:

- ☐ Täglich
- ☐ Wöchentlich
- ☐ Alle 14 Tage
- ☐ Monatlich
- ☐ 1-2 Mal
- ☐ Nie

**105 Wie häufig hast Du diese Substanz in den letzten 30 Tagen in der Freizeit z.B. im Ausgang, an Parties etc. durchschnittlich verwendet?**

Bitte wählen Sie nur eine der folgenden Antworten aus:

- ☐ An 20 oder mehr Tagen
- ☐ An 10-19 Tagen
- ☐ An 4-9 Tagen
- ☐ An 1-3 Tagen
- ☐ Gar nicht

**106 Wie viele Standarddrinks<sup>1</sup> pro Tag bei dem Du Alkohol getrunken hast, hast du durchschnittlich im letzten Monat getrunken?**

Bitte wählen Sie nur eine der folgenden Antworten aus:

- ☐ 0 oder weniger als 1
- ☐ 1 oder 2
- ☐ 3 oder 4
- ☐ 5 oder 6
- ☐ 7 oder 8
- ☐ 9 oder mehr

<sup>1</sup>Ein Standarddrink entspricht einem Glas Wein (ca. 1dl), einem Bier (ca. 3dl), einem Gläschen Spirituosen (ca. 4cl), einer Flasche Alkopops, einem Aperitif oder einem Longdrink. Ein grosses Bier (grosse Dose oder grosses Glas) entspricht 2 Standarddrinks, eine Flasche Wein 7 Standarddrinks.

**Alkohol zur Verbesserung deiner Gehirnleistung**

Diese Fragen betreffen deinen Konsum von **Alkohol zur Verbesserung deiner Gehirnleistung**. Also um bessere Leistungen zu erbringen, mit dem Schul- oder Arbeitsstress klarzukommen, um besser und länger lernen oder arbeiten zu können oder um vor der Prüfung oder einem Stresstag besser schlafen und entspannen zu können?

**107 Wie häufig hast Du diese Substanz in den letzten 12 Monaten durchschnittlich verwendet, um deine Gehirnleistung für die Berufsvorbereitungsschule/Berufsfachschule/Kantonsschule zu verbessern?**

Bitte wählen Sie nur eine der folgenden Antworten aus:

- ☐ Täglich
- ☐ Wöchentlich
- ☐ Alle 14 Tage
- ☐ Monatlich
- ☐ 1-2 Mal
- ☐ Nie

**108 Wie häufig hast Du diese Substanz in den letzten 30 Tagen (ohne Urlaub) verwendet, um deine Gehirnleistung für die Berufsvorbereitungsschule/Berufsfachschule/Kantonsschule zu verbessern?**

Bitte wählen Sie nur eine der folgenden Antworten aus:

- ☐ An 20 oder mehr Tagen
- ☐ An 10-19 Tagen
- ☐ An 4-9 Tagen
- ☐ An 1-3 Tagen
- ☐ Gar nicht

**109 Was war der Grund für die Einnahme?**

Bitte wählen Sie alle zutreffenden Antworten aus:

- ☐ Wach bleiben/länger lernen
- ☐ Sich konzentrieren/Aufmerksam sein
- ☐ Gedächtnis verbessern

- ☐ High sein (Rausch erzeugen)
- ☐ Gefühl geniessen
- ☐ Mit dem Druck klar kommen
- ☐ Besser schlafen können
- ☐ Allgemeine Entspannung
- ☐ Noten verbessern
- ☐ Prüfungsangst während der Prüfung bekämpfen
- ☐ Weil andere es tun
- ☐ Sonstiges:

**110 Wurden Deine Erwartungen an die Wirkung der Substanz erfüllt?**

Bitte wählen Sie nur eine der folgenden Antworten aus:

- ☐ Ja
- ☐ Nein
- ☐ Teilweise
- ☐ Ich weiss nicht

**111 Würdest Du es in einer ähnlichen Situation wieder einnehmen?**

Bitte wählen Sie nur eine der folgenden Antworten aus:

- ☐ Ja
- ☐ Nein
- ☐ Vielleicht
- ☐ Ich weiss nicht

**Tabak in der Freizeit**

Diese Fragen betreffen deinen Konsum von **Tabak** (zum Beispiel Zigaretten, Zigarren, Pfeife, Schnupftabak, Kautabak) in der **Freizeit**.

**112 Wie häufig hast Du diese Substanz in den letzten 12 Monaten in der Freizeit z.B. im Ausgang, an Parties etc. durchschnittlich verwendet?**

Bitte wählen Sie nur eine der folgenden Antworten aus:

- ☐ Täglich
- ☐ Wöchentlich
- ☐ Alle 14 Tage
- ☐ Monatlich
- ☐ 1-2 Mal
- ☐ Nie

**113 Wie häufig hast Du diese Substanz in den letzten 30 Tagen in der Freizeit z.B. im Ausgang, an Parties etc. durchschnittlich verwendet?**

Bitte wählen Sie nur eine der folgenden Antworten aus:

- ☐ An 20 oder mehr Tagen
- ☐ An 10-19 Tagen

- ☐ An 4-9 Tagen  
☐ An 1-3 Tagen  
☐ Gar nicht

### **Tabak zur Verbesserung deiner Gehirnleistung**

Diese Fragen betreffen deinen Konsum von **Tabak** (zum Beispiel Zigaretten, Zigarren, Pfeife, Schnupftabak, Kautabak) zur **Verbesserung deiner Gehirnleistung**. Also um bessere Leistungen zu erbringen, mit dem Schul- oder Arbeitsstress klarzukommen, um besser und länger lernen oder arbeiten zu können oder um vor der Prüfung oder einem Stresstag besser schlafen und entspannen zu können?

#### **114 Wie häufig hast Du diese Substanz in den letzten 12 Monaten durchschnittlich verwendet, um deine Gehirnleistung für die Berufsvorbereitungsschule/Berufsfachschule/Kantonsschule zu verbessern?**

Bitte wählen Sie nur eine der folgenden Antworten aus:

- ☐ Täglich  
☐ Wöchentlich  
☐ Alle 14 Tage  
☐ Monatlich  
☐ 1-2 Mal  
☐ Nie

#### **115 Wie häufig hast Du diese Substanz in den letzten 30 Tagen (ohne Urlaub) verwendet, um deine Gehirnleistung für die Berufsvorbereitungsschule/Berufsfachschule/Kantonsschule zu verbessern?**

Bitte wählen Sie nur eine der folgenden Antworten aus:

- ☐ An 20 oder mehr Tagen  
☐ An 10-19 Tagen  
☐ An 4-9 Tagen  
☐ An 1-3 Tagen  
☐ Gar nicht

#### **116 Was war der Grund für die Einnahme?**

Bitte wählen Sie alle zutreffenden Antworten aus:

- ☐ Wach bleiben/länger lernen  
☐ Sich konzentrieren/Aufmerksam sein  
☐ Gedächtnis verbessern  
☐ High sein (Rausch erzeugen)  
☐ Gefühl geniessen  
☐ Mit dem Druck klar kommen  
☐ Besser schlafen können  
☐ Allgemeine Entspannung  
☐ Noten verbessern  
☐ Prüfungsangst während der Prüfung bekämpfen  
☐ Weil andere es tun

☐ Sonstiges:

**117 Wurden Deine Erwartungen an die Wirkung der Substanz erfüllt?**

Bitte wählen Sie nur eine der folgenden Antworten aus:

- ☐ Ja  
☐ Nein  
☐ Teilweise  
☐ Ich weiss nicht

**118 Würdest Du es in einer ähnlichen Situation wieder einnehmen?**

Bitte wählen Sie nur eine der folgenden Antworten aus:

- ☐ Ja  
☐ Nein  
☐ Vielleicht  
☐ Ich weiss nicht

**Hanfprodukte in der Freizeit**

Diese Fragen betreffen deinen Konsum von **Hanfprodukte** (zum Beispiel Cannabis (Marihuana), Hasch, Haschöl) in der **Freizeit**.

**119 Wie häufig hast Du diese Substanz in den letzten 12 Monaten in der Freizeit z.B. im Ausgang, an Parties etc. durchschnittlich verwendet?**

Bitte wählen Sie nur eine der folgenden Antworten aus:

- ☐ Täglich  
☐ Wöchentlich  
☐ Alle 14 Tage  
☐ Monatlich  
☐ 1-2 Mal  
☐ Nie

**120 Wie häufig hast Du diese Substanz in den letzten 30 Tagen in der Freizeit z.B. im Ausgang, an Parties etc. durchschnittlich verwendet?**

Bitte wählen Sie nur eine der folgenden Antworten aus:

- ☐ An 20 oder mehr Tagen  
☐ An 10-19 Tagen  
☐ An 4-9 Tagen  
☐ An 1-3 Tagen  
☐ Gar nicht

**Hanfprodukte zur Verbesserung deiner Gehirnleistung**

Diese Fragen betreffen deinen Konsum von **Hanfprodukte** (zum Beispiel Cannabis (Marihuana), Hasch, Haschöl) zur **Verbesserung deiner Gehirnleistung**. Also um bessere Leistungen zu erbringen, mit dem Schul- oder Arbeitsstress klarzukommen, um besser und länger lernen oder arbeiten zu können oder um vor der Prüfung

oder einem Stresstag besser schlafen und entspannen zu können?

**121 Wie häufig hast Du diese Substanz in den letzten 12 Monaten durchschnittlich verwendet, um deine Gehirnleistung für die Berufsvorbereitungsschule/Berufsfachschule/Kantonsschule zu verbessern?**

Bitte wählen Sie nur eine der folgenden Antworten aus:

- ☐ Täglich
- ☐ Wöchentlich
- ☐ Alle 14 Tage
- ☐ Monatlich
- ☐ 1-2 Mal
- ☐ Nie

**122 Wie häufig hast Du diese Substanz in den letzten 30 Tagen (ohne Urlaub) verwendet, um deine Gehirnleistung für die Berufsvorbereitungsschule/Berufsfachschule/Kantonsschule zu verbessern?**

Bitte wählen Sie nur eine der folgenden Antworten aus:

- ☐ An 20 oder mehr Tagen
- ☐ An 10-19 Tagen
- ☐ An 4-9 Tagen
- ☐ An 1-3 Tagen
- ☐ Gar nicht

**123 Was war der Grund für die Einnahme?**

Bitte wählen Sie alle zutreffenden Antworten aus:

- ☐ Wach bleiben/länger lernen
- ☐ Sich konzentrieren/Aufmerksam sein
- ☐ Gedächtnis verbessern
- ☐ High sein (Rausch erzeugen)
- ☐ Gefühl geniessen
- ☐ Mit dem Druck klar kommen
- ☐ Besser schlafen können
- ☐ Allgemeine Entspannung
- ☐ Noten verbessern
- ☐ Prüfungsangst während der Prüfung bekämpfen
- ☐ Weil andere es tun
- ☐ Sonstiges:

**124 Wurden Deine Erwartungen an die Wirkung der Substanz erfüllt?**

Bitte wählen Sie nur eine der folgenden Antworten aus:

- ☐ Ja
- ☐ Nein
- ☐ Teilweise
- ☐ Ich weiss nicht

**125 Würdest Du es in einer ähnlichen Situation wieder einnehmen?**

Bitte wählen Sie nur eine der folgenden Antworten aus:

- ☐ Ja
- ☐ Nein
- ☐ Vielleicht
- ☐ Ich weiss nicht

**Kokain in der Freizeit**

Diese Fragen betreffen deinen Konsum von **Kokain** in der **Freizeit**.

**126 Wie häufig hast Du diese Substanz in den letzten 12 Monaten in der Freizeit z.B. im Ausgang, an Parties etc. durchschnittlich verwendet?**

Bitte wählen Sie nur eine der folgenden Antworten aus:

- ☐ Täglich
- ☐ Wöchentlich
- ☐ Alle 14 Tage
- ☐ Monatlich
- ☐ 1-2 Mal
- ☐ Nie

**127 Wie häufig hast Du diese Substanz in den letzten 30 Tagen in der Freizeit z.B. im Ausgang, an Parties etc. durchschnittlich verwendet?**

Bitte wählen Sie nur eine der folgenden Antworten aus:

- ☐ An 20 oder mehr Tagen
- ☐ An 10-19 Tagen
- ☐ An 4-9 Tagen
- ☐ An 1-3 Tagen
- ☐ Gar nicht

**Kokain zur Verbesserung deiner Gehirnleistung**

Diese Fragen betreffen deinen Konsum von **Kokain** zur **Verbesserung deiner Gehirnleistung**. Also um bessere Leistungen zu erbringen, mit dem Schul- oder Arbeitsstress klarzukommen, um besser und länger lernen oder arbeiten zu können oder um vor der Prüfung oder einem Stresstag besser schlafen und entspannen zu können?

**128 Wie häufig hast Du diese Substanz in den letzten 12 Monaten durchschnittlich verwendet, um deine Gehirnleistung für die Berufsvorbereitungsschule/Berufsfachschule/Kantonsschule zu verbessern?**

Bitte wählen Sie nur eine der folgenden Antworten aus:

- ☐ Täglich
- ☐ Wöchentlich
- ☐ Alle 14 Tage
- ☐ Monatlich
- ☐ 1-2 Mal
- ☐ Nie

**129 Wie häufig hast Du diese Substanz in den letzten 30 Tagen (ohne Urlaub) verwendet, um deine Gehirnleistung für die Berufsvorbereitungsschule/Berufsfachschule/Kantonsschule zu verbessern?**

Bitte wählen Sie nur eine der folgenden Antworten aus:

- ☐ An 20 oder mehr Tagen
- ☐ An 10-19 Tagen
- ☐ An 4-9 Tagen
- ☐ An 1-3 Tagen
- ☐ Gar nicht

**130 Was war der Grund für die Einnahme?**

Bitte wählen Sie alle zutreffenden Antworten aus:

- ☐ Wach bleiben/länger lernen
- ☐ Sich konzentrieren/Aufmerksam sein
- ☐ Gedächtnis verbessern
- ☐ High sein (Rausch erzeugen)
- ☐ Gefühl geniessen
- ☐ Mit dem Druck klar kommen
- ☐ Besser schlafen können
- ☐ Allgemeine Entspannung
- ☐ Noten verbessern
- ☐ Prüfungsangst während der Prüfung bekämpfen
- ☐ Weil andere es tun
- ☐ Sonstiges:

**131 Wurden Deine Erwartungen an die Wirkung der Substanz erfüllt?**

Bitte wählen Sie nur eine der folgenden Antworten aus:

- ☐ Ja
- ☐ Nein
- ☐ Teilweise
- ☐ Ich weiss nicht

**132 Würdest Du es in einer ähnlichen Situation wieder einnehmen?**

Bitte wählen Sie nur eine der folgenden Antworten aus:

- ☐ Ja
- ☐ Nein
- ☐ Vielleicht
- ☐ Ich weiss nicht

**Amphetamine in der Freizeit**

Diese Fragen betreffen deinen Konsum von **Amphetamine** (Speed) in der **Freizeit**.

**133 Wie häufig hast Du diese Substanz in den letzten 12 Monaten in der Freizeit z.B. im Ausgang, an**

**Parties etc. durchschnittlich verwendet?**

Bitte wählen Sie nur eine der folgenden Antworten aus:

- ☐ Täglich
- ☐ Wöchentlich
- ☐ Alle 14 Tage
- ☐ Monatlich
- ☐ 1-2 Mal
- ☐ Nie

**134 Wie häufig hast Du diese Substanz in den letzten 30 Tagen in der Freizeit z.B. im Ausgang, an Parties etc. durchschnittlich verwendet?**

Bitte wählen Sie nur eine der folgenden Antworten aus:

- ☐ An 20 oder mehr Tagen
- ☐ An 10-19 Tagen
- ☐ An 4-9 Tagen
- ☐ An 1-3 Tagen
- ☐ Gar nicht

**Amphetamine zur Verbesserung deiner Gehirnleistung**

Diese Fragen betreffen deinen Konsum von **Amphetamine** (Speed) zur **Verbesserung deiner Gehirnleistung**. Also um bessere Leistungen zu erbringen, mit dem Schul- oder Arbeitsstress klarzukommen, um besser und länger lernen oder arbeiten zu können oder um vor der Prüfung oder einem Stresstag besser schlafen und entspannen zu können?

**135 Wie häufig hast Du diese Substanz in den letzten 12 Monaten durchschnittlich verwendet, um deine Gehirnleistung für die Berufsvorbereitungsschule/Berufsfachschule/Kantonsschule zu verbessern?**

Bitte wählen Sie nur eine der folgenden Antworten aus:

- ☐ Täglich
- ☐ Wöchentlich
- ☐ Alle 14 Tage
- ☐ Monatlich
- ☐ 1-2 Mal
- ☐ Nie

**136 Wie häufig hast Du diese Substanz in den letzten 30 Tagen (ohne Urlaub) verwendet, um deine Gehirnleistung für die Berufsvorbereitungsschule/Berufsfachschule/Kantonsschule zu verbessern?**

Bitte wählen Sie nur eine der folgenden Antworten aus:

- ☐ An 20 oder mehr Tagen
- ☐ An 10-19 Tagen
- ☐ An 4-9 Tagen
- ☐ An 1-3 Tagen
- ☐ Gar nicht

**137 Was war der Grund für die Einnahme?**

Bitte wählen Sie alle zutreffenden Antworten aus:

- ☐ Wach bleiben/länger lernen
- ☐ Sich konzentrieren/Aufmerksam sein
- ☐ Gedächtnis verbessern
- ☐ High sein (Rausch erzeugen)
- ☐ Gefühl geniessen
- ☐ Mit dem Druck klar kommen
- ☐ Besser schlafen können
- ☐ Allgemeine Entspannung
- ☐ Noten verbessern
- ☐ Prüfungsangst während der Prüfung bekämpfen
- ☐ Weil andere es tun
- ☐ Sonstiges:

**138 Wurden Deine Erwartungen an die Wirkung der Substanz erfüllt?**

Bitte wählen Sie nur eine der folgenden Antworten aus:

- ☐ Ja
- ☐ Nein
- ☐ Teilweise
- ☐ Ich weiss nicht

**139 Würdest Du es in einer ähnlichen Situation wieder einnehmen?**

Bitte wählen Sie nur eine der folgenden Antworten aus:

- ☐ Ja
- ☐ Nein
- ☐ Vielleicht
- ☐ Ich weiss nicht

**Ecstasy (MDMA) in der Freizeit**

Diese Fragen betreffen deinen Konsum von **Ecstasy (MDMA)** in der **Freizeit**.

**140 Wie häufig hast Du diese Substanz in den letzten 12 Monaten in der Freizeit z.B. im Ausgang, an Parties etc. durchschnittlich verwendet?**

Bitte wählen Sie nur eine der folgenden Antworten aus:

- ☐ Täglich
- ☐ Wöchentlich
- ☐ Alle 14 Tage
- ☐ Monatlich
- ☐ 1-2 Mal
- ☐ Nie

**141 Wie häufig hast Du diese Substanz in den letzten 30 Tagen in der Freizeit z.B. im Ausgang, an Parties etc. durchschnittlich verwendet?**

Bitte wählen Sie nur eine der folgenden Antworten aus:

- ☐ An 20 oder mehr Tagen
- ☐ An 10-19 Tagen
- ☐ An 4-9 Tagen
- ☐ An 1-3 Tagen
- ☐ Gar nicht

### **Ecstasy (MDMA) zur Verbesserung deiner Gehirnleistung**

Diese Fragen betreffen deinen Konsum von **Ecstasy (MDMA)** zur **Verbesserung deiner Gehirnleistung**. Also um bessere Leistungen zu erbringen, mit dem Schul- oder Arbeitsstress klarzukommen, um besser und länger lernen oder arbeiten zu können oder um vor der Prüfung oder einem Stresstag besser schlafen und entspannen zu können?

**142 Wie häufig hast Du diese Substanz in den letzten 12 Monaten durchschnittlich verwendet, um deine Gehirnleistung für die Berufsvorbereitungsschule/Berufsfachschule/Kantonsschule zu verbessern?**

Bitte wählen Sie nur eine der folgenden Antworten aus:

- ☐ Täglich
- ☐ Wöchentlich
- ☐ Alle 14 Tage
- ☐ Monatlich
- ☐ 1-2 Mal
- ☐ Nie

**143 Wie häufig hast Du diese Substanz in den letzten 30 Tagen (ohne Urlaub) verwendet, um deine Gehirnleistung für die Berufsvorbereitungsschule/Berufsfachschule/Kantonsschule zu verbessern?**

Bitte wählen Sie nur eine der folgenden Antworten aus:

- ☐ An 20 oder mehr Tagen
- ☐ An 10-19 Tagen
- ☐ An 4-9 Tagen
- ☐ An 1-3 Tagen
- ☐ Gar nicht

**144 Was war der Grund für die Einnahme?**

Bitte wählen Sie alle zutreffenden Antworten aus:

- ☐ Wach bleiben/länger lernen
- ☐ Sich konzentrieren/Aufmerksam sein
- ☐ Gedächtnis verbessern
- ☐ High sein (Rausch erzeugen)
- ☐ Gefühl geniessen
- ☐ Mit dem Druck klar kommen
- ☐ Besser schlafen können
- ☐ Allgemeine Entspannung
- ☐ Noten verbessern

- ☐ Prüfungsangst während der Prüfung bekämpfen
- ☐ Weil andere es tun
- ☐ Sonstiges:

**145 Wurden Deine Erwartungen an die Wirkung der Substanz erfüllt?**

Bitte wählen Sie nur eine der folgenden Antworten aus:

- ☐ Ja
- ☐ Nein
- ☐ Teilweise
- ☐ Ich weiss nicht

**146 Würdest Du es in einer ähnlichen Situation wieder einnehmen?**

Bitte wählen Sie nur eine der folgenden Antworten aus:

- ☐ Ja
- ☐ Nein
- ☐ Vielleicht
- ☐ Ich weiss nicht

**Kaffee in der Freizeit**

Diese Fragen betreffen deinen Konsum von **Kaffee** in der **Freizeit**.

**147 Wie häufig hast Du diese Substanz in den letzten 12 Monaten in der Freizeit z.B. im Ausgang, an Parties etc. durchschnittlich verwendet?**

Bitte wählen Sie nur eine der folgenden Antworten aus:

- ☐ Täglich
- ☐ Wöchentlich
- ☐ Alle 14 Tage
- ☐ Monatlich
- ☐ 1-2 Mal
- ☐ Nie

**148 Wie häufig hast Du diese Substanz in den letzten 30 Tagen in der Freizeit z.B. im Ausgang, an Parties etc. durchschnittlich verwendet?**

Bitte wählen Sie nur eine der folgenden Antworten aus:

- ☐ An 20 oder mehr Tagen
- ☐ An 10-19 Tagen
- ☐ An 4-9 Tagen
- ☐ An 1-3 Tagen
- ☐ Gar nicht

**Kaffee zur Verbesserung deiner Gehirnleistung**

Diese Fragen betreffen deinen Konsum von **Kaffee** zur **Verbesserung deiner Gehirnleistung**. Also um bessere

Leistungen zu erbringen, mit dem Schul- oder Arbeitsstress klarzukommen, um besser und länger lernen oder arbeiten zu können oder um vor der Prüfung oder einem Stresstag besser schlafen und entspannen zu können?

**149 Wie häufig hast Du diese Substanz in den letzten 12 Monaten durchschnittlich verwendet, um deine Gehirnleistung für die Berufsvorbereitungsschule/Berufsfachschule/Kantonsschule zu verbessern?**

Bitte wählen Sie nur eine der folgenden Antworten aus:

- ☐ Täglich
- ☐ Wöchentlich
- ☐ Alle 14 Tage
- ☐ Monatlich
- ☐ 1-2 Mal
- ☐ Nie

**150 Wie häufig hast Du diese Substanz in den letzten 30 Tagen (ohne Urlaub) verwendet, um deine Gehirnleistung für die Berufsvorbereitungsschule/Berufsfachschule/Kantonsschule zu verbessern?**

Bitte wählen Sie nur eine der folgenden Antworten aus:

- ☐ An 20 oder mehr Tagen
- ☐ An 10-19 Tagen
- ☐ An 4-9 Tagen
- ☐ An 1-3 Tagen
- ☐ Gar nicht

**151 Was war der Grund für die Einnahme?**

Bitte wählen Sie alle zutreffenden Antworten aus:

- ☐ Wach bleiben/länger lernen
- ☐ Sich konzentrieren/Aufmerksam sein
- ☐ Gedächtnis verbessern
- ☐ High sein (Rausch erzeugen)
- ☐ Gefühl geniessen
- ☐ Mit dem Druck klar kommen
- ☐ Besser schlafen können
- ☐ Allgemeine Entspannung
- ☐ Noten verbessern
- ☐ Prüfungsangst während der Prüfung bekämpfen
- ☐ Weil andere es tun
- ☐ Sonstiges:

**152 Wurden Deine Erwartungen an die Wirkung der Substanz erfüllt?**

Bitte wählen Sie nur eine der folgenden Antworten aus:

- ☐ Ja
- ☐ Nein
- ☐ Teilweise
- ☐ Ich weiss nicht

**153 Würdest Du es in einer ähnlichen Situation wieder einnehmen?**

Bitte wählen Sie nur eine der folgenden Antworten aus:

- ☐ Ja
- ☐ Nein
- ☐ Vielleicht
- ☐ Ich weiss nicht

**Koffeintabletten in der Freizeit**

Diese Fragen betreffen deinen Konsum von **Koffeintabletten** (zum Beispiel Coffeinum N®, Percoffedrinol®) in der **Freizeit**.

**154 Wie häufig hast Du diese Substanz in den letzten 12 Monaten in der Freizeit z.B. im Ausgang, an Parties etc. durchschnittlich verwendet?**

Bitte wählen Sie nur eine der folgenden Antworten aus:

- ☐ Täglich
- ☐ Wöchentlich
- ☐ Alle 14 Tage
- ☐ Monatlich
- ☐ 1-2 Mal
- ☐ Nie

**155 Wie häufig hast Du diese Substanz in den letzten 30 Tagen in der Freizeit z.B. im Ausgang, an Parties etc. durchschnittlich verwendet?**

Bitte wählen Sie nur eine der folgenden Antworten aus:

- ☐ An 20 oder mehr Tagen
- ☐ An 10-19 Tagen
- ☐ An 4-9 Tagen
- ☐ An 1-3 Tagen
- ☐ Gar nicht

**Koffeintabletten zur Verbesserung deiner Gehirnleistung**

Diese Fragen betreffen deinen Konsum von **Koffeintabletten** (zum Beispiel Coffeinum N®, Percoffedrinol®) zur **Verbesserung deiner Gehirnleistung**. Also um bessere Leistungen zu erbringen, mit dem Schul- oder Arbeitsstress klarzukommen, um besser und länger lernen oder arbeiten zu können oder um vor der Prüfung oder einem Stresstag besser schlafen und entspannen zu können?

**156 Wie häufig hast Du diese Substanz in den letzten 12 Monaten durchschnittlich verwendet, um deine Gehirnleistung für die Berufsvorbereitungsschule/Berufsfachschule/Kantonsschule zu verbessern?**

Bitte wählen Sie nur eine der folgenden Antworten aus:

- ☐ Täglich
- ☐ Wöchentlich
- ☐ Alle 14 Tage
- ☐ Monatlich

- ☐ 1-2 Mal  
☐ Nie

**157 Wie häufig hast Du diese Substanz in den letzten 30 Tagen (ohne Urlaub) verwendet, um deine Gehirnleistung für die Berufsvorbereitungsschule/Berufsfachschule/Kantonsschule zu verbessern?**

Bitte wählen Sie nur eine der folgenden Antworten aus:

- ☐ An 20 oder mehr Tagen  
☐ An 10-19 Tagen  
☐ An 4-9 Tagen  
☐ An 1-3 Tagen  
☐ Gar nicht

**158 Was war der Grund für die Einnahme?**

Bitte wählen Sie alle zutreffenden Antworten aus:

- ☐ Wach bleiben/länger lernen  
☐ Sich konzentrieren/Aufmerksam sein  
☐ Gedächtnis verbessern  
☐ High sein (Rausch erzeugen)  
☐ Gefühl geniessen  
☐ Mit dem Druck klar kommen  
☐ Besser schlafen können  
☐ Allgemeine Entspannung  
☐ Noten verbessern  
☐ Prüfungsangst während der Prüfung bekämpfen  
☐ Weil andere es tun  
☐ Sonstiges:

**159 Wurden Deine Erwartungen an die Wirkung der Substanz erfüllt?**

Bitte wählen Sie nur eine der folgenden Antworten aus:

- ☐ Ja  
☐ Nein  
☐ Teilweise  
☐ Ich weiss nicht

**160 Würdest Du es in einer ähnlichen Situation wieder einnehmen?**

Bitte wählen Sie nur eine der folgenden Antworten aus:

- ☐ Ja  
☐ Nein  
☐ Vielleicht  
☐ Ich weiss nicht

**Energy Drinks in der Freizeit**

Diese Fragen betreffen deinen Konsum von **Energy Drinks** (zum Beispiel Red Bull®, guaranahaltige Getränke) in der **Freizeit**.

**161 Wie häufig hast Du diese Substanz in den letzten 12 Monaten in der Freizeit z.B. im Ausgang, an Parties etc. durchschnittlich verwendet?**

Bitte wählen Sie nur eine der folgenden Antworten aus:

- ☐ Täglich
- ☐ Wöchentlich
- ☐ Alle 14 Tage
- ☐ Monatlich
- ☐ 1-2 Mal
- ☐ Nie

**162 Wie häufig hast Du diese Substanz in den letzten 30 Tagen in der Freizeit z.B. im Ausgang, an Parties etc. durchschnittlich verwendet?**

Bitte wählen Sie nur eine der folgenden Antworten aus:

- ☐ An 20 oder mehr Tagen
- ☐ An 10-19 Tagen
- ☐ An 4-9 Tagen
- ☐ An 1-3 Tagen
- ☐ Gar nicht

### **Energy Drinks zur Verbesserung deiner Gehirnleistung**

Diese Fragen betreffen deinen Konsum von **Energy Drinks** (zum Beispiel Red Bull®, guaranahaltige Getränke) zur **Verbesserung deiner Gehirnleistung**. Also um bessere Leistungen zu erbringen, mit dem Schul- oder Arbeitsstress klarzukommen, um besser und länger lernen oder arbeiten zu können oder um vor der Prüfung oder einem Stresstag besser schlafen und entspannen zu können?

**163 Wie häufig hast Du diese Substanz in den letzten 12 Monaten durchschnittlich verwendet, um deine Gehirnleistung für die Berufsvorbereitungsschule/Berufsfachschule/Kantonsschule zu verbessern?**

Bitte wählen Sie nur eine der folgenden Antworten aus:

- ☐ Täglich
- ☐ Wöchentlich
- ☐ Alle 14 Tage
- ☐ Monatlich
- ☐ 1-2 Mal
- ☐ Nie

**164 Wie häufig hast Du diese Substanz in den letzten 30 Tagen (ohne Urlaub) verwendet, um deine Gehirnleistung für die Berufsvorbereitungsschule/Berufsfachschule/Kantonsschule zu verbessern?**

Bitte wählen Sie nur eine der folgenden Antworten aus:

- ☐ An 20 oder mehr Tagen
- ☐ An 10-19 Tagen
- ☐ An 4-9 Tagen

- ☐ An 1-3 Tagen  
☐ Gar nicht

**165 Was war der Grund für die Einnahme?**

Bitte wählen Sie alle zutreffenden Antworten aus:

- ☐ Wach bleiben/länger lernen  
☐ Sich konzentrieren/Aufmerksam sein  
☐ Gedächtnis verbessern  
☐ High sein (Rausch erzeugen)  
☐ Gefühl geniessen  
☐ Mit dem Druck klar kommen  
☐ Besser schlafen können  
☐ Allgemeine Entspannung  
☐ Noten verbessern  
☐ Prüfungsangst während der Prüfung bekämpfen  
☐ Weil andere es tun  
☐ Sonstiges:

**166 Wurden Deine Erwartungen an die Wirkung der Substanz erfüllt?**

Bitte wählen Sie nur eine der folgenden Antworten aus:

- ☐ Ja  
☐ Nein  
☐ Teilweise  
☐ Ich weiss nicht

**167 Würdest Du es in einer ähnlichen Situation wieder einnehmen?**

Bitte wählen Sie nur eine der folgenden Antworten aus:

- ☐ Ja  
☐ Nein  
☐ Vielleicht  
☐ Ich weiss nicht

**Andere Substanz in der Freizeit**

Diese Fragen betreffen deinen Konsum einer **anderen Substanz** in der **Freizeit**.

**168 Um welche Substanz(en) handelt es sich?**

Bitte geben Sie Ihre Antwort hier ein:

**169 Wie häufig hast Du diese Substanz in den letzten 12 Monaten in der Freizeit z.B. im Ausgang, an Parties etc. durchschnittlich verwendet?**

Bitte wählen Sie nur eine der folgenden Antworten aus:

- ☐ Täglich  
☐ Wöchentlich

- ☐ Alle 14 Tage  
☐ Monatlich  
☐ 1-2 Mal  
☐ Nie

**170 Wie häufig hast Du diese Substanz in den letzten 30 Tagen in der Freizeit z.B. im Ausgang, an Parties etc. durchschnittlich verwendet?**

Bitte wählen Sie nur eine der folgenden Antworten aus:

- ☐ An 20 oder mehr Tagen  
☐ An 10-19 Tagen  
☐ An 4-9 Tagen  
☐ An 1-3 Tagen  
☐ Gar nicht

### **Andere Substanz zur Verbesserung deiner Gehirnleistung**

Diese Fragen betreffen deinen Konsum einer **anderen Substanz** zur **Verbesserung deiner Gehirnleistung**. Also um bessere Leistungen zu erbringen, mit dem Schul- oder Arbeitsstress klarzukommen, um besser und länger lernen oder arbeiten zu können oder um vor der Prüfung oder einem Stresstag besser schlafen und entspannen zu können?

**171 Um welche Substanz(en) handelt es sich?**

Bitte geben Sie Ihre Antwort hier ein:

**172 Wie häufig hast Du diese Substanz in den letzten 12 Monaten durchschnittlich verwendet, um deine Gehirnleistung für die Berufsvorbereitungsschule/Berufsfachschule/Kantonsschule zu verbessern?**

Bitte wählen Sie nur eine der folgenden Antworten aus:

- ☐ Täglich  
☐ Wöchentlich  
☐ Alle 14 Tage  
☐ Monatlich  
☐ 1-2 Mal  
☐ Nie

**173 Wie häufig hast Du diese Substanz in den letzten 30 Tagen (ohne Urlaub) verwendet, um deine Gehirnleistung für die Berufsvorbereitungsschule/Berufsfachschule/Kantonsschule zu verbessern?**

Bitte wählen Sie nur eine der folgenden Antworten aus:

- ☐ An 20 oder mehr Tagen  
☐ An 10-19 Tagen  
☐ An 4-9 Tagen  
☐ An 1-3 Tagen  
☐ Gar nicht

**174 Was war der Grund für die Einnahme?**

Bitte wählen Sie alle zutreffenden Antworten aus:

- ☐ Wach bleiben/länger lernen
- ☐ Sich konzentrieren/Aufmerksam sein
- ☐ Gedächtnis verbessern
- ☐ High sein (Rausch erzeugen)
- ☐ Gefühl geniessen
- ☐ Mit dem Druck klar kommen
- ☐ Besser schlafen können
- ☐ Allgemeine Entspannung
- ☐ Noten verbessern
- ☐ Prüfungsangst während der Prüfung bekämpfen
- ☐ Weil andere es tun
- ☐ Sonstiges:

**175 Wurden Deine Erwartungen an die Wirkung der Substanz erfüllt?**

Bitte wählen Sie nur eine der folgenden Antworten aus:

- ☐ Ja
- ☐ Nein
- ☐ Teilweise
- ☐ Ich weiss nicht

**176 Würdest Du es in einer ähnlichen Situation wieder einnehmen?**

Bitte wählen Sie nur eine der folgenden Antworten aus:

- ☐ Ja
- ☐ Nein
- ☐ Vielleicht
- ☐ Ich weiss nicht

**Nutzung und Bezug**

**177 Kennst Du Personen aus deinem Familien- und/oder Bekanntenkreis, die rezeptpflichtige Medikamente ohne medizinischen Grund und/oder psychoaktive Substanzen (wie zum Beispiel Cannabis, Kokain, Ecstasy etc.) konsumieren, um ihre Gehirnleistung zu verbessern?**

Bitte wählen Sie nur eine der folgenden Antworten aus:

- ☐ Ja
- ☐ Nein

**178 Von welcher Quelle beziehst Du rezeptpflichtige Medikamente, die Du zur Verbesserung deiner Gehirnleistung für die Schule einsetzen willst/wolltest?**

Bitte wählen Sie nur eine der folgenden Antworten aus:

- ☐ Internet
- ☐ Arzt/Ärztin
- ☐ Pädiater/Pädiaterin bzw. Kinderarzt/Kinderärztin
- ☐ Psychiater/Psychiaterin

- ☐ Apotheker/Apothekerin
- ☐ Von jemandem, der das Medikament vom Arzt verschrieben bekam
- ☐ Dealer
- ☐ Eltern
- ☐ Kollege/Kollegin
- ☐ Andere Personen
- ☐ Ich beziehe keine verschreibungspflichtigen Medikamente zur Verbesserung der Gehirnleistung

**179 In welchen Situationen hast du die Substanz(en) zum Hirndoping hauptsächlich eingenommen oder nimmst Du die Substanz(en) hauptsächlich ein?**

Bitte wählen Sie nur eine der folgenden Antworten aus:

- ☐ Prüfungsvorbereitung
- ☐ Prüfungssituation
- ☐ Allgemein bei Stress
- ☐ Sonstiges

**Moralische Fragen**

**180 Bist du grundsätzlich einverstanden damit, dass Schüler/innen Medikamente und/oder psychoaktive Substanzen (wie zum Beispiel Cannabis, Kokain, Ecstasy etc.) konsumieren um Ihre Gehirnleistung zu verbessern?**

Bitte wählen Sie nur eine der folgenden Antworten aus:

- ☐ Ja
- ☐ Nein

**181 Gibt es für Dich persönlich gute Gründe, die den Konsum von Medikamenten und/oder psychoaktiven Substanzen (wie zum Beispiel Cannabis, Kokain, Ecstasy etc.) zur Verbesserung der Gehirnleistung für die Schule entschuldigen können? (mehrere Antworten möglich)**

Bitte wählen Sie alle zutreffenden Antworten aus:

- ☐ Aufmerksamkeit / Konzentration / Gedächtnisleistung steigern
- ☐ Müdigkeit unterdrücken
- ☐ Schlafstörungen
- ☐ Termindruck
- ☐ Konflikte
- ☐ Konkurrenzdruck
- ☐ Nervosität / Lampenfieber
- ☐ Schlechte Stimmung
- ☐ Schmerzen
- ☐ Freundlichere Ausstrahlung
- ☐ Depression / psychische Erkrankung
- ☐ Grippe / Erkältung / Fieber
- ☐ Ärztliche Empfehlung
- ☐ Nein, es gibt keine vertretbaren Gründe

☐ Sonstiges:

## Gesundheitszustand

**182 Warst Du jemals wegen einer oder mehrerer der folgenden psychischen Erkrankungen in therapeutischer/ärztlicher Behandlung bzw. wurde bei Dir bereits jemals eine der folgenden psychischen Erkrankungen diagnostiziert/festgestellt oder?**

Bitte wählen Sie alle zutreffenden Antworten aus:

- ☐ Keine
- ☐ ADS oder ADHS
- ☐ Depressive Störung/Depression
- ☐ Zwangsstörung
- ☐ Angststörung
- ☐ Persönlichkeitsstörung
- ☐ Posttraumatische Belastungsstörung
- ☐ Suchterkrankung
- ☐ andere psychische Erkrankung, nämlich:

**183 Wurde bei Dir bereits eine oder mehrere der folgenden körperlichen Erkrankungen diagnostiziert/festgestellt oder warst Du deswegen in ärztlicher Behandlung**

Bitte wählen Sie alle zutreffenden Antworten aus:

- ☐ Keine
- ☐ Herzprobleme
- ☐ Lungen-/Atembeschwerden
- ☐ Schlafkrankung
- ☐ Krebs
- ☐ Andere Langzeiterkrankung, nämlich:

**184 Nimmst Du oder hast Du früher aufgrund der Erkrankung regelmässig Medikamente eingenommen?**

Bitte wählen Sie nur eine der folgenden Antworten aus:

- ☐ Ja
- ☐ Nein

**185 Welche Medikamente hast Du eingenommen?**

**Beantworten Sie diese Frage nur, wenn folgende Bedingungen erfüllt sind:**

Antwort war 'Ja' bei Frage 184 (Nimmst Du oder hast Du früher aufgrund der Erkrankung regelmässig Medikamente eingenommen? )

Bitte geben Sie Ihre Antwort hier ein:

**186 Hast Du das Medikament schon mal anders (d.h. zeitlich verschoben, in einer anderen Menge oder über einen anderen Einnahmeweg wie z. B. geschnupft anstatt geschluckt) als ärztlich verschrieben eingenommen, um deine schulischen Leistungen zu verbessern?**

**Beantworten Sie diese Frage nur, wenn folgende Bedingungen erfüllt sind:**

Antwort war 'Ja' bei Frage 184 (Nimmst Du oder hast Du früher aufgrund der Erkrankung regelmässig Medikamente eingenommen? )

Bitte wählen Sie nur eine der folgenden Antworten aus:

☐ Ja

☐ Nein

## **Liebe Schülerin, lieber Schüler**

Gerne möchten wir Dir noch wichtige Informationen zur Studie mitgeben.

Wie bereits anfangs erläutert, zeigt die Forschung, dass gewisse Schüler/innen und Studierende zu Medikamenten und/oder anderen Substanzen greifen, um Hirndoping zu betreiben.

Dies wird getan, obwohl die **Wirksamkeit** der Hirndoping-Substanzen bislang **nicht erwiesen** ist.

Viele Studien, die bis anhin durchgeführt wurden, zeigen, dass der Konsum der Hirndoping-Substanzen **keine** Verbesserung der geistigen Leistungsfähigkeit bei gesunden Menschen herbeiführt. Manche Studien konnten sogar zeigen, dass der Konsum von Hirndoping-Substanzen mit einer **Verschlechterung** der geistigen Leistungsfähigkeit verbunden ist.

Hinzu kommt, dass die Einnahme vieler Substanzen mit **Nebenwirkungen** verbunden ist. Solche Nebeneffekte können schwerwiegend sein. Sie können je nach Substanz zum Beispiel als Kopfschmerzen, Übelkeit, Schlafstörungen, Bluthochdruck, Wachstumshemmung, Angstzustände, Herzerkrankungen, neurologische Störungen, Hypersensibilität oder Suchtprobleme auftreten.

**Das Fazit lautet deshalb: Hirndoping bringt wenig oder nichts und ist riskant!**

Wir danken Dir herzlich für deine Mitarbeit!

Bei Fragen oder Anmerkungen zur Studie stehen wir Dir gerne zur Verfügung:  
[hirndopingfragen@hotmail.com](mailto:hirndopingfragen@hotmail.com)

Projektleitung:

PD Dr. Michael Schaub, Direktor Schweizer Institut für Sucht- und Gesundheitsforschung; Domenic Schnoz, lic. phil., Leiter Zürcher Fachstelle für Alkohol- und Medikamentenprobleme; Vigeli Venzin, Leiter Fachstelle Suchtprävention Mittelschulen und Berufsbildung

Vielen Dank für die Beantwortung des Fragebogens!
